## **Investigating genetic diversity within the most abundant and prevalent non-pathogenic leaf-associated bacteria interacting with *Arabidopsis thaliana* in natural habitats**

Daniela Ramirez-Sanchez<sup>1,†</sup>, Chrystel Gibelin-Viala<sup>1,†</sup>, Baptiste Mayjonade<sup>1,†</sup>, Rémi Duflos<sup>1</sup>, Elodie Belmonte<sup>2</sup>, Vincent Pailler<sup>2</sup>, Claudia Bartoli<sup>3</sup>, Sébastien Carrere<sup>1</sup>, Fabienne Vaillau<sup>1,\*</sup> and Fabrice Roux<sup>1,\*</sup>

<sup>1</sup> LIPME, INRAE, CNRS, Université de Toulouse, Castanet-Tolosan, France

<sup>2</sup> Gentyane, UMR 1095 GDEC, INRAE, Université Clermont Auvergne, Clermont-Ferrand, France

<sup>3</sup> Institute for Genetics, Environment and Plant Protection (IGEPP), INRAE, Institut Agro AgroCampus Ouest, Université de Rennes 1, Le Rheu, France.

† These authors have contributed equally to this work and share first authorship.

\* The authors share senior authorship.

\* Corresponding author: [fabrice.roux@inrae.fr](mailto:fabrice.roux@inrae.fr) (F. Roux)

1 **ABSTRACT**

2 Plants interact simultaneously with highly diversified microbes defined as the plant microbiota.  
3 Microbiota modulates plant health and appears as a promising lever to develop innovative,  
4 sustainable and eco-friendly agro-ecosystems. Key patterns of microbiota assemblages in plants  
5 have been revealed by an extensive number of studies based on taxonomic profiling by  
6 metabarcoding. However, understanding the functionality of microbiota and identifying the  
7 genetic and molecular mechanisms underlying the interplay between plants and their microbiota  
8 are still in its infancy and relies on reductionist approaches primarily based on the establishment  
9 of representative microbial collections. In *Arabidopsis thaliana*, most of these microbial  
10 collections include one strain per OTU isolated from a limited number of habitats, thereby  
11 neglecting the ecological potential of genetic diversity within microbial species to affect the  
12 plant-microbiota molecular dialog. With this study, we aimed at estimating the extent of genetic  
13 variation between strains within the most abundant and prevalent leaf-associated non-  
14 pathogenic bacterial species in 163 natural populations of *A. thaliana* located south-west of  
15 France. By combining a culture-based collection approach consisting of the isolation of more  
16 than 7,000 bacterial colonies with an informative-driven approach, we isolated 35 pure strains  
17 from eight non-pathogenic bacterial species. We detected significant intra-specific genetic  
18 variation at the genomic level and for growth rate in synthetic media. In addition, significant  
19 host genetic variation was detected in response to most bacterial strains in *in vitro* conditions,  
20 with the presence of both negative and positive responses on plant growth. Our study provides  
21 new genetic and genomic resources for a better understanding of the plant-microbe ecological  
22 interactions at the microbiota level. We also highlight the need of considering genetic variation  
23 in both non-pathogenic bacterial species and *A. thaliana* to decipher the genetic and molecular  
24 mechanisms involved in the ecologically relevant dialog between hosts and leaf microbiota.

25

26

27 **KEYWORDS**

28 Microbiota, commensal bacteria, genomic diversity, plant growth promotion, growth kinetics,  
29 seed inoculation, seedling inoculation, genotype-by-genotype interactions

## 30 INTRODUCTION

31 During their life cycle, plants interact simultaneously with a large and diverse set of  
32 microbial organisms - viruses, bacteria, fungi, oomycetes, archaea and protists - defined as the  
33 plant microbiota and often referred as the second genome of plants, in agreement with the  
34 holobiont/hologenome theory of evolution (Roux and Bergelson, 2016; Morris, 2018). Plant  
35 microbiota mainly originates from the soil reservoirs, even if a non-negligible fraction of  
36 microbes may originate from the aerial sphere (Müller et al., 2016). For long, microbes were  
37 considered harmful to the plants. Accordingly, an extensive knowledge has been acquired on  
38 the molecular dialog between plants and pathogens (Jones and Dangl, 2006; Deslandes and  
39 Rivas, 2012; Roux et al., 2014; Uhse and Djamei, 2018; Delplace et al., 2021; Ngou et al.,  
40 2022). Nowadays, it is well-known that a large fraction of plant-associated microbes are  
41 beneficial for their hosts. For instance, plant growth promoting bacteria (PGPB) can mobilize  
42 and provision nutrients to plants either directly or indirectly by enhancing interaction with other  
43 microbes. For example, in wheat, rhizobia strains can both increase wheat root development  
44 and improve the wheat-arbuscular mycorrhiza interactions (Bartoli et al., 2020). Beneficial  
45 bacteria can also provide protection against pathogens, either directly through the production  
46 of antimicrobial compounds, competition for nutrients and colonization sites, or indirectly with  
47 the induction of plant defense such as systemic resistance mechanisms (Berendsen et al., 2012;  
48 Bulgarelli et al., 2013; Pieterse et al., 2014; Trivedi et al., 2020; Glick and Gamalero, 2021).

49 During the last decade, the rise of next-generation sequencing technologies enabled a  
50 deep taxonomic characterization of microbial communities of the rhizosphere, root and leaf  
51 compartments in diverse wild and crop species, which in turn allowed to identify key patterns  
52 of plant microbiota assemblages (Müller et al., 2016). Firstly, microbial communities are not  
53 randomly assembled (Bulgarelli et al., 2012; Lundberg et al., 2012). In line with this, strong  
54 and reproducible successional dynamics were observed in phyllosphere communities  
55 (Maignien et al., 2014), which are mainly colonized by bacterial members of the three phyla  
56 Proteobacteria, Actinobacteria and Bacteroidetes (Vorholt, 2012; Bodenhausen et al., 2013).  
57 Secondly, microbiota composition and assemblage largely differ between plant compartments  
58 (Coleman-Derr et al., 2016; Wagner et al., 2016; Trivedi et al., 2020), with phyllosphere  
59 communities being relatively less diverse and presenting more inter-individual variability than  
60 rhizosphere communities (Lebeis, 2015). Microbial communities also largely differ between  
61 endophytic and epiphytic compartments, with microbiota richness in roots being higher in the  
62 episphere than in the endosphere, while the reverse is true for leaves (Bodenhausen et al., 2013;

63 Lebeis et al., 2015). Thirdly, extensive variation in microbiota composition was detected *in situ*  
64 among natural populations at diverse geographical scales (Bodenhausen et al., 2013; Agler et  
65 al., 2016; Coleman-Derr et al., 2016; Geremia et al., 2016; Thiergart et al., 2020). For instance,  
66 at a regional scale, the level of differentiation for bacterial communities among more than 160  
67 natural populations of *Arabidopsis thaliana* reached up to ~81% in both leaf and root  
68 compartments (Bartoli et al., 2018). Spatial variation in microbiota composition results from  
69 the intermixed effects of host genetics and environmental variation, such as climate, soil  
70 agronomic properties and companion plant species (Alekklett et al., 2015; Geremia et al., 2016;  
71 Thiergart et al., 2020; Meyer et al., 2022). Fourthly, both artificial and natural genetic variation  
72 indicate that variation of host control within plant species is governed by many genes of small  
73 effect, with the exception of genes involved in the circadian clock or the biosynthesis of  
74 specialized metabolites such as thalianin and arabidin (Bergelson et al., 2021).

75 Taxonomic profiling of microbial communities were then followed, albeit only in few  
76 instances, by studies dedicated to functionally characterize plant-microbiota interactions. Plant-  
77 microbiota functional characterization has been mostly conducted in *A. thaliana* and first  
78 required the establishment of representative microbial collections. Starting with a collection of  
79 microbes isolated from *A. thaliana* plants grown on an agricultural soil from Germany in  
80 greenhouse conditions (Bai et al., 2015; Durán et al., 2018), bacterial root commensals were  
81 demonstrated to both deeply influence fungal and oomycetal community structure and protect  
82 plant against root-derived filamentous eukaryotes (Durán et al., 2018). Using synthetic  
83 communities (SynCom) derived from the same collection and inoculated on germ-free plants,  
84 recolonization experiments demonstrated specialization of bacteria to their respective plant  
85 niche from which they originate (*i.e.* leaf and root), while forming assemblies resembling  
86 natural bacterial communities (Bai et al., 2015). Still based on the same collection, a SynCom  
87 approach also revealed that community assemblies in phyllosphere are historically contingent  
88 and subject to priority effects (Carlström et al., 2019). On the other hand, a collection of  
89 bacterial isolates from an agricultural soil in USA highlighted the close interplay of root  
90 microbiota with plant immunity (Lebeis et al., 2015; Teixeira et al., 2021) and plant response  
91 to nutritional stress (Castrillo et al., 2017). Finally, when bacterial collections are paired with  
92 genome sequencing, a large overlap of genome-encoded functional capabilities was revealed  
93 between leaf- and root-derived bacteria (Bai et al., 2015).

94 While these studies started to provide a glimpse of the functional mechanisms  
95 underlying host-microbiota dialog, most microbial collections from *A. thaliana* were  
96 established on the isolation of one representative strain per Operational Taxonomic Unit (OTU)

97 and from a very limited number of agricultural and natural sites, thereby neglecting the  
98 ecological potential of genetic diversity within microbial species to strongly impact the  
99 outcomes of plant-microbiota interactions. Yet, extensive genetic variation among natural  
100 populations of *A. thaliana* was detected for virulence among strains of the main bacterial  
101 species of its pathobiota (*i.e.* *Pseudomonas syringae*, *Pseudomonas viridiflava* and  
102 *Xanthomonas campestris*) (Bartoli et al., 2018), which is in line with the large genomic diversity  
103 observed in both *P. syringae* and *Xanthomonas arboricola* at a local population scale (Karasov  
104 et al., 2014, 2018; Wang et al., 2018).

105 As a first step to investigate the effects of genetic diversity within microbial species on  
106 plant-microbiota interactions and to identify the underlying genetic and molecular mechanisms  
107 in both host plant and microbes, we aimed at establishing an informative collection of several  
108 isolates of the 12 most abundant and prevalent non-pathogenic leaf-associated bacterial OTUs  
109 among 163 natural populations of *A. thaliana* located south-west of France (Bartoli et al., 2018).  
110 We focused on bacterial communities in the phyllosphere because of (i) the 60% contribution  
111 of the phyllosphere to the biomass across all taxa on Earth, (ii) to the complex natural habitats  
112 provided by leaves with extensive microscale variation and diverse nutriment provided for  
113 bacterial growth, and (iii) the benefits provided by phyllosphere bacteria to their hosts through  
114 production of plant growth-promoting hormones and protection against pathogen infection  
115 (Lindow and Brandl, 2003; Vorholt, 2012; Maignien et al., 2014; Koskella, 2020). We first  
116 describe the isolation of several strains of seven of the most abundant and prevalent bacterial  
117 OTUs by combining a community-based culture (CBC) approach based on the amplification of  
118 a fraction of the *gyrB* gene (Bartoli et al., 2018), with an informative-driven approach based on  
119 specific culture media and the design of specific primers for each OTU. Based on 22  
120 representative bacterial strains, we then report the extent of (i) genomic variation among and  
121 within OTUs, (ii) genetic variation on *in vitro* bacterial growth kinetics, and (iii) genotype-by-  
122 genotype (GxG) interactions between the isolates and eight genotypes of *A. thaliana* (including  
123 seven local accessions and the reference genotype Col-0) on plant growth when inoculated at  
124 the seed and seedling stages.

125

126

127

128

129

130

## 131 MATERIAL AND METHODS

### 132 Identification of the most prevalent and abundant OTUs

133 One hundred and sixty-three natural populations of *A. thaliana* located south-west of France  
134 have been previously characterized for bacterial communities by a metabarcoding approach  
135 based on a portion of the *gyrB* gene (Watanabe et al., 2001; Bartoli et al., 2018). More precisely,  
136 821 rosettes collected *in situ* in autumn 2014 and spring 2015 were characterized. For each  
137 rosette sample, we estimated the relative abundance of each of the 6,627 most abundant OTUs  
138 out of the 278,333 identified OTUs (Bartoli et al., 2018). Then, we selected OTUs both present  
139 in more than 5% of rosettes ( $n > 41$ ) and with a mean relative abundance across all rosettes  
140 above 0.7%, resulting in 13 leaf OTUs. From these 13 OTUs, we removed OTU8 (prevalence  
141 = 6.7%, mean relative abundance = 1.1%) corresponding to *P. viridiflava* for which 74 isolated  
142 strains from the natural populations of *A. thaliana* were confirmed to be pathogenic (Bartoli et  
143 al., 2018). We therefore focused on the remaining 12 OTUs (Figure 1A) for which taxonomic  
144 affiliation based on *gyrB* amplicon was identified according to GenBank BLASTN  
145 (Supplementary Data Set 1).

146

### 147 Isolation of strains

#### 148 *Leaf samples*

149 To isolate bacterial strains associated with the selected 12 OTUs, a total of 205 and 300 plants  
150 were collected across 91 populations in autumn 2014 and 152 populations in spring 2015,  
151 respectively. Plants were excavated using flame-sterilized spoons and then manipulated with  
152 flame-sterilized forceps on a sterilized porcelain plate. Gloves and plate were sterilized by using  
153 Surface'SafeAnios®. Rosettes were rinsed into individual tubes filled with sterilized distilled  
154 water to remove all visible dirt. Rosettes were then placed into sterilized tubes and immediately  
155 stored in a cooler filled with ice. The 505 rosettes were ground in 500  $\mu$ l of sterile distilled  
156 water solution and stored in a 20% glycerol solution at  $-80^{\circ}\text{C}$ . The epiphytic and endophytic  
157 compartments of rosettes were not separated.

158

#### 159 *Community-based culture approach*

160 In order to isolate multiple strains for each of the 12 candidate OTUs, 48 strains were randomly  
161 isolated from two rosettes (*i.e.* 24 strains per rosette) for each of the 152 natural populations  
162 sampled in spring 2015 (Supplementary Figure 1, Supplementary Table 1). To do so, serial  
163 dilutions of glycerol stocks were performed from  $10^{-2}$  to  $10^{-7}$  using sterile distilled water. For

164 each of three successive serial dilutions ( $10^{-5}$  to  $10^{-7}$ ), 100  $\mu$ l were plated on a tryptic soy broth  
165 (TSB) agar medium (3 g/L TSB and 12 g/L agar) in 10 cm  $\times$  10cm square Petri dishes. After  
166 48H of growth at 28°C, 24 colonies were randomly chosen for each rosette. Each colony was  
167 picked with a sterile 10  $\mu$ l tip attached to a P10 pipette, then dipped in a well of a 96-well PCR  
168 plate filled with 20  $\mu$ l of a *gyrB* PCR mix (4  $\mu$ l of 5x GoTaq buffer (Promega, Madison, WI,  
169 USA), 0.4  $\mu$ l of 10mM dNTP, 0.4  $\mu$ l of each 10 $\mu$ M primer, 0.1  $\mu$ l of Tween 20, 0.2  $\mu$ l of 5u/ $\mu$ l  
170 GoTaq G2 Polymerase (Promega), and 14.5  $\mu$ l of PCR-grade water) and mixed by pipetting  
171 up and down 3 times. Afterwards, the same tip was dipped and mixed by pipetting up and down  
172 3 times in a well of a 96-well 0.8 ml deep well plate filled with 300  $\mu$ l liquid 3g/L TSB medium.  
173 After incubation at 28°C for 48H, 150  $\mu$ l of 60% glycerol was added and plates were stored at  
174 -80°C. Amplification was then performed as follows: 94°C (2 min) followed by 40 cycles of  
175 amplification at 94°C (30 s), 50°C (60 s), and 68°C (90 s), with a final extension step of 10 min  
176 at 68°C. PCR products were checked on a 2% agarose gel.

177 In order to multiplex the 7,259 amplicons, corresponding to 7,259 picked colonies, on a single  
178 Miseq run, seven forward and seven reverse *gyrB* primers containing different internal tags  
179 were combined for each PCR plate (Supplementary Data Set 2). The 76 96-well PCR plates  
180 were then pooled into four pools of 96 samples. Pooled amplicons were purified by using Clean  
181 PCR beads (CleanNA, Waddinxveen, The Netherlands) and following the manufacturer's  
182 instructions. Purified amplicons were quantified with a Nanodrop and appropriately diluted to  
183 obtain an equimolar concentration. The second PCR was prepared in 50  $\mu$ l and contained 2  $\mu$ l  
184 of equimolar PCR-purified products, 5  $\mu$ l of 10X MTP Taq buffer (Sigma-Aldrich, Saint-Louis,  
185 MO, USA), 1  $\mu$ l of 10 mM dNTP, 1.25  $\mu$ l of 20  $\mu$ M forward P5 primer, 1.25  $\mu$ l of 20 $\mu$ M  
186 barcoded reverse P7 primer, 0.5  $\mu$ l MTP Taq DNA polymerase (Sigma-Aldrich), and 39  $\mu$ l of  
187 PCR-grade water. The list and sequences of the primers are given in the Supplementary Data  
188 Set 2. Amplification was performed as follow: 94°C (60 s) followed by 12 cycles of 94°C (60  
189 s), 65°C (60 s), 72°C (60 s) and finally 72°C (10 min). Amplicons were further purified and  
190 quantified as described above to obtain a unique equimolar pool. The latter was quantified by  
191 real-time quantitative reverse transcriptase-polymerase chain reaction and then sequenced on a  
192 Illumina MiSeq system with 2  $\times$  250bp paired-end reads (Illumina Inc., San Diego, CA, USA)  
193 at the GeT-PlaGe Platform (Toulouse, France). MS-102-3003 MiSeq Reagent Kit v3 600 cycle  
194 was used for this purpose.

195 Demultiplexed Illumina barcoded libraries (available at NCBI SRA under SRP372434  
196 accession) were trimmed with "fastx\_trimmer -t 51" ([http://hannonlab.cshl.edu/fastx\\_toolkit/](http://hannonlab.cshl.edu/fastx_toolkit/),  
197 access on January 6<sup>th</sup> 2022) to produce 200nt high-quality reads and assembled using FLASH

198 (Magoč and Salzberg, 2011) assembler (version 1.2.11) with the following parameters "--max-  
199 overlap 120 --min-overlap 50". Assembled amplicons were then scanned to identify internal  
200 tags on both ends using exact match regular expressions (Supplementary Data Set 3,  
201 Supplementary Data Set 4).

202 A total of 14,956,927 reads were obtained for 7,066 out of the 7,259 sequenced colonies, with  
203 a mean number of reads per sample of 2,117 (confidence intervals 95%: 177 – 6889). To  
204 taxonomically classify these 7,066 samples, we used the DADA2 (Callahan et al., 2016)  
205 pipeline (version 1.6.0) to identify 6,362 amplicon sequence variants (ASVs) that we assigned  
206 to the closest taxon using a manually curated *gyrB* database composed of 38,929 sequences  
207 (version 2) (Supplementary Data Set 5) (Barret et al., 2015).

208 Among the 7,066 samples, we identified 5 samples with at least 10% of the reads belonging to  
209 an ASV matching to OTU2 with an identity  $\geq 98\%$ . With the same criteria, we identified 55  
210 samples for OTU3, 21 samples for OTU5, 365 samples for OTU6 and 59 samples for OTU29.

211

### 212 ***Informative-driven approach to isolate pure strains***

213 To isolate pure strains from the 505 identified samples, we adopted an approach combining the  
214 use of selective medium including specific antibiotics and genus-specific primers  
215 (Supplementary Figure 1, Supplementary Table 1, Supplementary Table 2). For OTUs missing  
216 specific primers in the literature, we designed specific ones based on *gyrB* sequences  
217 (Supplementary Material, Supplementary Table 3). With this combined approach, we retrieved  
218 3 pure strains for OTU2, 7 pure strains for OTU3, 8 pure strains for OTU5, 6 pure strains for  
219 OTU6 and 8 pure strains for OTU29.

220 For the isolation of pure strains for the remaining seven OTUs (OTU1, OTU4, OTU10, OTU12,  
221 OTU13, OTU14 and OTU15), the same strategy was applied on rosette samples collected in  
222 either autumn or spring, from natural populations presenting the highest relative abundance for  
223 these OTUs in their leaf microbiota (Bartoli et al., 2018). Serial dilutions from glycerol stocks  
224 were performed from  $10^{-2}$  to  $10^{-7}$  using sterile distilled water. For each dilution, 100  $\mu$ l were  
225 plated on the corresponding selective medium in 10 cm  $\times$  10 cm square Petri dishes. Colonies  
226 were grown at 28°C for at least 48H. Colonies selected based on morphological aspects and for  
227 amplifying with the specific primers, were further amplified and sequenced with the Sanger  
228 technology for the *gyrB* gene with universal primers (Barret et al., 2015). The resulting *gyrB*  
229 sequences were blasted against both (i) a database that contains the sequences of the 6,627 most  
230 abundant OTUs identified across our 163 natural populations of *A. thaliana* (Bartoli et al.,



231 2018), and (ii) the NCBI database. All the bacterial strains with a *gyrB* sequence matching one  
232 of the *gyrB* OTU sequences of interest with an identity  $\geq 98\%$  and over  $\geq 200$  bp were stored  
233 in a 20% glycerol solution at  $-80^{\circ}\text{C}$ . After using this approach on the remaining seven OTUs,  
234 we retrieved one pure strain for OTU4 and two pure strains for OTU13.

235 Finally, by combining the CBC and informative-driven approaches, we isolated a total of 35  
236 pure strains for seven OTUs (OTU2, OTU3, OTU4, OTU5, OTU6, OTU13 and OTU29).

237

### 238 **Genomic sequences**

239 For a subset of 22 strains maximizing the geographical diversity among the 35 pure isolated  
240 strains (Table 1, Supplementary Table 1), high molecular weight DNA was extracted from  
241 bacterial culture grown for 24H at  $28^{\circ}\text{C}$  in appropriate media (TSB for OTU2, R2A for OTU3,  
242 OTU4, OTU13 and TSA for OTU5, OTU6, OTU29) following the protocols described in  
243 (Mayjonade et al., 2016). The purity of the DNA samples was assessed on a NanoDrop  
244 spectrophotometer (A260/A280 and A260/A230 ratios) and the DNA concentration was  
245 measured with a Qubit dsDNA HS reagent Assay Kit (Life Technologies). Single-molecule  
246 Real-time long reads sequencing was performed at the Gentyane core facility (Clermont-  
247 Ferrand, France) with a PacBio Sequel II system (Pacific Biosciences, Menlo Park, CA, USA).  
248 The SMRTBell library was prepared using a SMRTbell Express 2 Template prep kit, following  
249 the “procedure and checklist -preparing Multiplexed Microbial Libraries using SMRTbell  
250 Express Template prep kit 2.0” protocol. Briefly, for each strain, 1  $\mu\text{g}$  of genomic DNA was  
251 sheared into approximately 10 kb fragments using g-tubes (Covaris, England). A Fragment  
252 Analyzer (Agilent Technologies, Santa Clara, CA, USA) assay was used to assess the size  
253 distribution of fragments. Sheared genomic DNA samples were carried into the enzymatic  
254 reactions to remove the single-strand overhangs and to repair any damage that may be present  
255 on the DNA backbone. An A-tailing reaction followed by the overhang adapter ligation  
256 (SMRTbell Barcoded Adapter Plate 3.0) was conducted to generate the SMRT Bell templates.  
257 The samples were then purified with 0.45X AMPure PB Beads to obtain the final libraries at  
258 around 10 kb. The SMRTBell libraries were checked for quality using a Fragment Analyzer  
259 (Agilent Technologies) and quantified with a Qubit dsDNA HS Assay Kit. A ready-to-sequence  
260 SMRTBell Polymerase Complex was created using a Binding Kit 2.2 (PacBio) and the primer  
261 V5. The adaptive loading protocol was used according to the manufacturer's instructions. The  
262 PacBio Sequel instrument was programmed to load a 90 pM library and sequenced in CCS  
263 mode on a PacBio SMRTcell 8M, with the Sequencing Plate 2.0 (Pacific Biosciences), 2 hours  
264 of pre-extension time and acquiring one movie of 15 hours.

265 For each strain, raw PacBio sequences were self-corrected using ccs software (version 6.0.0)  
266 with a minimum of 3 passes. Assembly was performed with FLYE assembler (version 2.9)  
267 (Kolmogorov et al., 2020) with the specific parameters "--pacbio-hifi " and for each strain an  
268 estimated genome assembly size (from 4Mb to 9Mb). We used *DnaA* gene sequence to  
269 determine chromosome start for each assembled circular chromosome and annotate genomes  
270 using bacannot (version 3.1) (de Almeida and Pappas Jr, 2022), InterProScan (version 5.54-  
271 87.0) (Jones et al., 2014) and Blast2GO (version 1.5.1) (Götz et al., 2008) to infer putative  
272 functions.

273

### 274 **ANI taxonomic affiliation**

275 In order to accurately assign the taxonomy of the sequenced strains, we used FastANI, an  
276 algorithm representing the Average Nucleotide Identity (ANI) of all orthologous genes shared  
277 between two genomes (Jain et al., 2018). To do so, for each OTU, the 10 closest genomes were  
278 retrieved from each of three quality-controlled and curated databases, *i.e.* JSpecies (Richter et  
279 al., 2016), GTDB-Tk (Chaumeil et al., 2019) and TYGS (Meier-Kolthoff and Göker, 2019).  
280 Identical genomes among the three databases were considered only once. Subsequently,  
281 FastANI was used to compute pairwise ANI between each strain and the JSpecies-GTDB-Tk-  
282 TYGS list of closest genomes. A strain was assigned to a species if the ANI value was > 95%.  
283 To confirm that all strains from a given OTU belong to the same bacterial species, pairwise  
284 ANI values among strains were estimated.

285

### 286 **Orthogroups**

287 We looked for orthologous and paralogous genes using OrthoFinder (Emms and Kelly, 2015)  
288 software (version 2.5.4, default parameters with diamond software as aligner) in order to extract  
289 core-genes. OrthoFinder results are available and queryable through Family-Companion  
290 (Cottret et al., 2018) software at this url: <https://doi.org/10.25794/e29x-aq46>. Based on  
291 Orthofinder results, a list of orthogroups was extracted for each of the six strains belonging to  
292 the OTU6. To estimate and illustrate the number of common and specific orthogroups between  
293 these six strains, a Venn diagram was generated using jvenn (Bardou et al., 2014).

294

### 295 **Growth kinetics**

296 The 22 selected strains were streaked onto their respective medium (Supplementary Table 1).  
297 All strains were grown at 28°C during 2 days (OTU2, OTU3, OTU4, OTU5 and OTU6) or 7  
298 days (OTU13 and OTU29). Colonies of each strain were then scrapped off with an inoculating

299 loop and re-suspended in 500  $\mu$ l of sterile distilled water. 250  $\mu$ l of that volume were sprayed  
300 in a new plate and incubated at 28°C overnight. Fresh colonies were scrapped off with an  
301 inoculating loop and diluted in 1 ml of sterile water. The suspension was adjusted to an OD<sub>600nm</sub>  
302 of 0.15 in a volume of 200  $\mu$ l deposited in a 96-well Greiner plate. For each strain, monitoring  
303 was performed both in the R2A minimal nutrient medium and the TSB rich nutrient medium.  
304 Bacterial growth was monitored using a microplate spectrophotometer (FLUOstar  
305 Omega, BMG Labtech, Germany) every 6 minutes during 72 hours, at 22°C under shaking at  
306 700 rpm using a linear shaking mode. Three to six independent biological repeats were  
307 performed for each strain.

308

### 309 **Host genetic variation in response to bacterial isolates**

310 To estimate the level of genetic variation of *A. thaliana* in response to each of the 22 selected  
311 strains in *in vitro* conditions, seven accessions were chosen to represent the genetic and habitat  
312 diversity observed among the 163 natural populations (Frachon et al., 2018, 2019)  
313 (Supplementary Figure 2). The reference accession Col-0 was also included in the *in vitro*  
314 experiments. To test whether the level of genetic variation of *A. thaliana* in response to OTUs  
315 was dependent on the developmental stage at which plants were inoculated, the eight accessions  
316 were inoculated at the seed and seedling stages.

317

### 318 ***Seed sterilization***

319 Seeds were surface-sterilized with chlorine gas one day before sowing and kept at 4°C. For this,  
320 eight Ø5cm Petri dishes, each containing seeds from one accession, and a beaker with 50 mL  
321 of bleach were placed in a plastic box under a fume hood. A volume of 5 mL of 37%  
322 hydrochloric acid was added to the bleach before closing the plastic box. After three hours,  
323 Petri dishes were opened in a microbiological sterile fume hood and left two hours to allow the  
324 evaporation of the bleach steam.

325

### 326 ***Plant growth conditions***

327 Plants were grown in 48-well and 24-well plates for the inoculation at the seed and seedling  
328 stages, respectively, on a 0.5x MS medium (Murashige & Skoog medium) modified according  
329 to Dr Andy Gloss (Department of Biology, New-York University). This medium contains 2.2  
330 g of MS medium, 0.5 g of 2-(N-Morpholino)-ethanesulfonic acid, 6.0 g of plant tissue culture  
331 agar (PhytoTechnology Laboratories, A296), 1L of milli-Q water and a pH adjusted to range of  
332 5.7-5.8. A volume of 700  $\mu$ L and 1 mL was dispensed in each well of the 48-well and 24-well

333 plates, respectively. A single seed was sown in each well. Seeds were stratified at 4 °C in the  
334 dark for seven days. Plates were then placed in a phytotron with short day conditions (10H  
335 photoperiod, light intensity ~ 80  $\mu\text{mol m}^{-2} \text{s}^{-1}$ , 21°C, 50% hygrometry). To reduce the effects  
336 of micro-environmental variation, the position of the plates was randomized in the phytotron  
337 every other day of the experiment.

338

### 339 ***Experimental design***

340 For the inoculation at the seed stage, the eight accessions of *A. thaliana* were inoculated with  
341 the 22 selected strains, according to a split-plot design with two blocks. Each block contained  
342 24 48-well plates, corresponding to two plates for the mock inoculation and one plate for each  
343 of the 22 strains. For each ‘block\*treatment’ combination, six seeds of the eight accessions  
344 were randomly sown among the 48 wells.

345 For the inoculation at the seedling stage, the eight accessions of *A. thaliana* were inoculated  
346 with the 22 selected strains, according to a split-plot design with four blocks. Each block  
347 contained 24 24-well plates, corresponding to two plates for the mock inoculation and one plate  
348 for each of the 22 strains. For each ‘block\*treatment’ combination, three seeds of the eight  
349 accessions were randomly sown among the 24 wells.

350 In both experiments, randomization was kept identical among treatments within a block, but  
351 differed between blocks.

352

### 353 ***Inoculation***

354 Bacterial suspensions were prepared as for the growth kinetics but adjusted to an  $\text{OD}_{600\text{nm}}$  of  
355 0.5 in sterile water and 0.2 in 0.001 % (v/v) of Tween 20, for the seed and seedling inoculation,  
356 respectively. For inoculation at the seed stage, 5  $\mu\text{L}$  of inoculum were dropped off on each seed  
357 the day of the sowing. For inoculation at the seedling stage, seedlings were inoculated 18 days  
358 after sowing using a ‘droplet’ method, which consisted of dispensing 50  $\mu\text{L}$  on each rosette.  
359 Sterile water without or with 0.001 % (v/v) of Tween 20 was used for the mock corresponding  
360 treatments. Plates were closed with a micropore tape (Micropore Surgical tape 3M 1530-0) to  
361 limit water evaporation of the medium, and incubated in the same phytotron conditions as  
362 described above.

363

### 364 ***Phenotyping***

365 For the two experiments, the germination date was scored on a daily basis between three and  
366 seven days after sowing. For inoculation at the seed stage, the 48-well plates were scanned at

367 14, 21 and 28 days after inoculation (dai) using the scanner Object Scan 1600 scanner  
368 (Microtek® Taiwan). For inoculation at the seedling stage, 24-well plates were scanned one  
369 day before inoculation (dbi) and 7, 14 and 21 dai using the same scanner. Based on the pictures,  
370 the vegetative growth of each plant was manually scored using a scale ranging from one (very  
371 small plants) to seven and eight (well-grown plants) for the inoculation at the seed and seedling  
372 stages, respectively. For each experiment, a total of 2,304 plants were phenotyped after  
373 inoculation. No disease symptoms was observed in our growing conditions.

374

### 375 *Statistical analysis*

376 For both experiments, we explored the genetic variation among the eight accessions of *A.*  
377 *thaliana* in response to each of the 22 bacterial strains, using the following mixed model (PROC  
378 MIXED procedure in SAS v. 9.4, SAS Institute Inc., Cary, NC, USA):

$$\begin{aligned} 379 \quad Y_{ijklm} = & \mu_{trait} + Block_i + Treatment_j + Block_i * Treatment_j + Accession_k + Time_t \\ 380 & + Accession_k * Treatment_j + Accession_k \\ 381 & * Time_t + Treatment * Time_t + Accession_k * Treatment_j * Time_t \\ 382 & + Line_l(Treatment_j * Time) + Column_m(Treatment_j * Time) \\ 383 & + \varepsilon_{ijklm} \text{ (Model 1)} \end{aligned}$$

384 where Y corresponds to the score of plant development, ‘ $\mu$ ’ is the overall mean of the  
385 phenotypic data, ‘Block’ accounts for differences in micro-environmental conditions between  
386 the blocks, ‘Line(Treatment)’ and ‘Column(Treatment)’ accounts for difference in micro-  
387 environmental conditions within 48-well or 24-well plates, ‘Treatment’ corresponds to the  
388 effect of each bacterial strain in comparison with the mock treatment, ‘Accession’ corresponds  
389 to the genetic differences among the eight accessions, ‘Time’ expressed in dbi/dai accounts for  
390 the evolution of developmental stage along the course of the experiment, the interacting terms  
391 test whether pairwise genetic differences among the eight accessions differ between the mock  
392 treatment and each treatment with a bacterial strain and/or with time, and ‘ $\varepsilon$ ’ is the residual  
393 term.

394 All factors were treated as fixed effects. For calculating *F* values, terms were tested over their  
395 appropriate denominators. Given the split-plot design used in the two experiments, the variance  
396 associated with the ‘block \* treatment’ term was for example used as the error term for testing  
397 the ‘block’ and ‘treatment’ effects. A correction for the number of tests was performed to  
398 control the False Discover Rate (FDR) at a nominal level of 5%.

399 For both *in vitro* experiments, least-square means (LSmeans) of the eight accessions were  
400 estimated for each ‘treatment \* scoring time’ combination using the following model (PROC  
401 MIXED procedure in SAS v. 9.4, SAS Institute Inc., Cary, NC, USA):

$$402 \quad Y_{ikl} = \mu_{trait} + Block_i + Accession_k + Line_l + Column_m + \varepsilon_{iklm} \text{ (Model 2)}$$

403 Because *A. thaliana* is a highly selfing species (Platt et al., 2010), LSmeans correspond to  
404 genotypic values of accessions.

405

## 406 **RESULTS**

### 407 **Isolation of strains of the most prevalent and abundant OTUs of the leaf compartment in** 408 **163 natural populations of *A. thaliana* located south-west of France**

409 Based on the characterization of bacterial communities of 821 rosettes of *A. thaliana* collected  
410 *in situ* in autumn 2014 and spring 2015 from 163 local populations located south-west of France  
411 (Bartoli et al., 2018), we focused on 12 non-pathogenic OTUs displaying both high prevalence  
412 (ranging from 5.7% for OTU2 to 44.6% for OTU1, mean = 19.1%) and high mean relative  
413 abundance (MRA) (ranging from 0.7% for OTU12 to 16.1% for OTU1, mean = 3.1%) (Table  
414 1). Based on *gyrB* taxonomic affiliation, these 12 OTUs belongs to nine genera, *i.e.*  
415 *Acidovorax*, *Caulobacter*, *Collimonas*, *Methylobacterium*, *Modestobacter*, *Paraburkholderia*,  
416 *Pseudomonas*, *Sphingomonas* and *Variovorax* (Table 1, Supplementary Data Set 1). The 12  
417 candidate OTUs are well spread across the *gyrB*-related phylogeny of the 30 most abundant  
418 OTUs across the 163 local populations of *A. thaliana* by considering both leaf and root  
419 compartments (Bartoli et al., 2018) (Figure 1A).

420 To isolate representative strains for each of the 12 candidate OTUs, we adopted two approaches  
421 (Supplementary Figure 1). Firstly, based on a community-based culture (CBC) approach, we  
422 isolated 7,259 bacterial colonies from 152 natural populations of *A. thaliana*. Using the Illumina  
423 technology, the amplification of a *gyrB* amplicon was successfully achieved for 7,066 bacterial  
424 colonies, from which 3,746 (*i.e.* 53%) were taxonomically assigned at the phylum level. Among  
425 these 3,746 samples, we identified five samples with at least 10% of the reads belonging to an  
426 ASV matching to OTU2 with an identity  $\geq 98\%$ . With the same criteria, we identified 55  
427 samples for OTU3, 21 samples for OTU5, 365 samples for OTU6 and 59 samples for OTU29.  
428 To isolate pure strains from these samples and pure strains for the remaining seven OTUs, we  
429 adopted a second approach based on selective media, antibiotic resistance and the design of

430 specific primers (Supplementary Figure 1). This informative-driven approach allowed the  
431 isolation of 35 pure strains for seven OTUs (3 strains for OTU2, 7 strains for OTU3, 1 strain  
432 for OTU4, 8 strains for OTU5, 6 strains for OTU6, 2 strains for OTU13 and 8 strains for  
433 OTU29). These seven OTUs show diverse morphological aspects in terms of color and shape  
434 (Figure 1B).

435

### 436 **Genomic variation among and within OTUs**

437 As a first step to characterize genetic variation among and within OTUs, we generated *de novo*  
438 genome sequences using PacBio technology for 22 strains maximizing the geographic diversity  
439 for each OTU (3 strains for OTU2, four strains for OTU3, 1 strain for OTU4, 3 strains for  
440 OTU5, 6 strains for OTU6, 2 strains for OTU13 and 3 strains for OTU29). Despite several  
441 attempts, we failed to generate *de novo* genome sequence for one strain of OTU3 and one strain  
442 of OTU13. For all the other strains, chromosome and plasmid genomes were assembled in  
443 single contigs and circularized, with the exception of one plasmid for the strain of OTU13 that  
444 was not circularized (Table 2). Strong genomic differences were observed among the seven  
445 OTUs (Table 2). Firstly, the bacterial chromosome size varies from ~3.2Mb for OTU4 to  
446 ~7.7Mb for one strain of OTU3 (mean = 5.5Mb). Secondly, because the number and size of  
447 plasmids largely differed among the seven OTUs and even among strains within some OTUs  
448 (Table 2), the total genome size was not strictly related to the chromosome size. For instance,  
449 the total size of plasmids represents on average 46.8% and 29.3% of total genome size for OTUs  
450 2 and 4, respectively. On the other hand, for the OTUs 6, 13 and 29 with the presence of  
451 plasmids in at least one strain, the total size of plasmids represents less than 5% of the total  
452 genome size. Thirdly, G+C content varies between 60% for OTUs 5 and 6 to 70% for OTU4  
453 (mean = 64.4%). Fourthly, the number of genes largely differs among OTUs (from ~3,723  
454 genes for OTU29 to ~8,426 genes for OTU2) and was strictly correlated with total genome size  
455 (Pearson's correlation coefficient  $r = 0.99$ ). Finally, the percentage of coding sequences with  
456 assigned function varies between 54.3% for OTU13 to 67.9% for OTU4 (mean = 64.3%).

457 ANI-based genomic taxonomic classification confirmed or refined the *gyrB*-based taxonomic  
458 classification for OTU2, OTU5, OTU6 and OTU13 as *Paraburkholderia fungorum*,  
459 *Pseudomonas moraviensis*, *Pseudomonas siliginis* and *Methylobacterium* sp., respectively  
460 (Table 1, Supplementary Data Set 6). However, ANI-based genomic taxonomic classification  
461 for the remaining three OTUs only provided a resolution down to the family level, *i.e.*

462 Oxalobacteraceae for OTU3, Comamonadaceae for OTU4 and Sphingomonadaceae for OTU29  
463 (Table 1, Supplementary Data Set 6). For each OTU, pairwise ANI values were computed  
464 between all strains and revealed that all strains belong to the same species (using a species cut-  
465 off value of 0.95), with the exception of OTU3 for which two species were identified  
466 (Supplementary Table 4). Hereafter, these two species are named OTU3a\_*Oxalobacteraceae*  
467 bacterium and OTU3b\_*Oxalobacteraceae* bacterium (Table 1), thereby leading to a total  
468 number of eight OTUs.

469 A strong variation in the gene content was also observed among strains within a given OTU.  
470 For instance, 5,185 orthogroups were identified among the six strains of OTU6\_*Pseudomonas*  
471 *siliginis*, with 83.1% (4,310 orthogroups) being shared among the six strains and 8.8% (456  
472 orthogroups) being specific to one or two strains (Figure 2).

473

#### 474 **Inter- and intra-genetic variation of bacterial growth kinetics**

475 To further characterize our set of 22 representative strains, we monitored their growth kinetics  
476 on two media with contrasting nutrient availability, *i.e.* the R2A minimal medium and the TSB  
477 rich medium. Over the time course of 40 hours, growth kinetics was more diverse among the  
478 eight OTUs in the rich medium than in the minimal medium (Figure 3). In the rich medium, on  
479 average, the OTUs 2, 5 and 6 reached larger population size than the other OTUs, the two strains  
480 of OTU13 growing very slowly (Figure 3B). The level of genetic variation among strains within  
481 a specific OTU for growth kinetics was highly dependent on the ‘medium \* OTU identity’  
482 combination. While almost no intra-OTU genetic variation was detected in both media for  
483 OTU6 (Figure 3) and OTU5 (Supplementary Figure 3), intra-OTU genetic variation was  
484 detected in both media for OTUs 3a, 3b (Figure 3) and OTU13 (Supplementary Figure 3). For  
485 the OTUs 2 and 29, the level of genetic variation among strains was highly dependent on the  
486 medium. For instance, while the three strains of OTU29 had a similar growth kinetics on the  
487 minimal medium, they largely differed in their growth kinetics on the rich medium starting after  
488 ~15H of culture (Figure 3). An opposite pattern was observed for OTU2, with genetic variation  
489 for growth kinetics observed in the minimal medium but not in the rich medium (Supplementary  
490 Figure 3).

491

492

493



#### 494 **The extent of host genetic variation in response to bacterial strains in *in vitro* conditions**

495 To estimate the extent of GxG interactions between *A. thaliana* and the main members of its  
496 microbiota, seven local accessions of *A. thaliana* originating from diverse habitats across the  
497 163 natural populations located south-west of France (Supplementary Figure 2) as well as the  
498 reference accession Col-0, were inoculated with the 22 selected bacterial strains at the seed and  
499 seedling stages in *in vitro* conditions (Figure 4A, Figure 5A).

500 Based on scoring vegetative growth following previously defined scales (Figure 4B, Figure  
501 5B), several patterns emerged from these *in vitro* experiments. Firstly, when significant, host  
502 genetic variation in response to a particular bacterial strain, was not dependent on the timing of  
503 scoring (Supplementary Tables 5 & 6). Secondly, host genetic variation was dependent on the  
504 developmental stage at which plants were inoculated (Figure 4C, Figure 5C, Supplementary  
505 Figure 4). No significant variation among the eight accessions of *A. thaliana* was detected in  
506 response to 10 bacterial strains, when inoculated either at the seed stage or at the seedling stage  
507 (Supplementary Tables 5 & 6). For the remaining 12 bacterial strains, significant genetic  
508 variation among the eight accessions was detected only when inoculated at the seed stage (n =  
509 4 strains), only when inoculated at the seedling stage (n = 5 strains), or when inoculated at both  
510 stages (n = 3 strains) (Supplementary Table 5 and 6). Thirdly, host genetic variation was more  
511 dependent on the strain identity than the OTU identity (Figure 4C, Figure 5C, Supplementary  
512 Figure 4). For instance, while no host genetic variation was detected in response to  
513 OTU2\_*Pfu*\_1 and OTU2\_*Pfu*\_2, genetic variation among the eight accessions was detected in  
514 response to OTU2\_*Pfu*\_3 at both developmental stages (Supplementary Tables 5 and 6).  
515 Another example is related to OTU29\_*Sphingomonadaceae*\_bacterium. When inoculated at the  
516 seed stage, host genetic variation was observed in response to OTU29\_*Sph*\_1 and  
517 OTU29\_*Sph*\_3 but not in response to OTU29\_*Sph*\_2 (Supplementary Table 5). An opposite  
518 pattern was observed when inoculation was conducted at the seedling stage (Supplementary  
519 Table 6). Fourthly, contrasted responses were observed among the eight accessions in response  
520 to a particular bacterial strain (Figure 4C, Figure 5C, Supplementary Figure 4). For instance, at  
521 28 dai after seed inoculation, the strain OTU6\_*Psi*\_1 had a negative effect on the accessions  
522 MONTG-D-2 and MONTB-A-10, a neutral effect on the accessions BERNA-A-1 and SEIS-A-  
523 2, and a positive effect on the four remaining accessions (Figure 4C). Similarly, at 21 dai after  
524 seedling inoculation, the strain OTU3a\_*Oxa*\_2 had a positive effect on the accessions MONTG-  
525 D-2, NAUV-B-14 and Col-0, a neutral effect on the accession CAPE-A-3, and a negative effect  
526 on the four remaining accessions (Figure 5C).

527 **DISCUSSION**

528 **Mining ecologically relevant genetic diversity within leaf-associated bacterial OTUs of *A.***  
529 ***thaliana***

530 The importance of studying the functionality of microbiota and establishing causal relationships  
531 between microbial species and between a given host plant and its microbiota mainly relies on  
532 adopting reductionist approaches (Vorholt et al., 2017; Hassani et al., 2018; Liu et al., 2019;  
533 Fitzpatrick et al., 2020), which first requires the establishment of representative microbial  
534 collections. In *A. thaliana*, such collections of bacterial and/or fungal isolates have been  
535 generated in several instances (Bai et al., 2015; Lebeis et al., 2015; Qi et al., 2021), which in  
536 turn allowed establishing SynComs (e.g. Durán et al., 2018; Carlström et al., 2019). While  
537 informative, these microbial collections would certainly benefit from exploiting intra-OTU  
538 genetic diversity from a large range of environments inhabited by the host species in order to  
539 increase the ecological realism of SynComs, as previously suggested for pathogens (Bartoli et  
540 al., 2016).

541 In this study, we adopted two complementary approaches to isolate pure strains from the 12  
542 most abundant and prevalent non-pathogenic leaf-associated bacterial OTUs in *A. thaliana*  
543 located south-west of France. Using the CBC approach, recovery estimates of the most  
544 abundant 6,627 OTUs identified among the 163 natural populations of *A. thaliana* (Bartoli et  
545 al., 2018) were 53%, a value similar to the recovery estimate (54%) of the top 100 leaf-  
546 associated bacterial OTUs from *A. thaliana* plants collected from natural sites in France,  
547 Germany and Switzerland (Bai et al., 2015). However, by using the CBC approach, we failed  
548 to isolate colonies for seven out of our 12 most abundant and prevalent leaf-associated bacterial  
549 OTUs. Because we obtained Illumina reads for 97.3% of the 7,259 picked colonies, this failure  
550 seems not to result from our colony PCR based protocol. However, it may originate from (i)  
551 the use of only one medium (TSB) for the CBC approach, and (ii) the use of leaf samples for  
552 strain isolation that differ from the leaf samples used for characterizing bacterial communities  
553 based on a *gyrB*-based metabarcoding approach. In addition, despite a large number of growing  
554 conditions implemented in this study coupled with the design of specific primers  
555 (Supplementary Table 1), our informative-driven approach only allowed isolating strains from  
556 two additional OTUs. Our capacity of isolate strains for only seven out of our 12 candidate  
557 OTUs provides another example of the difficulty of establishing a representative collection of  
558 microbes. The un-cultivability of many microbes could result from the absence of specific  
559 nutrients in the medium, specific factors produced by other microbes that are necessary for the

560 OTU of interest (*i.e.* cross-feeding), rigorous negative interspecies interactions (such as  
561 competition and inhibition), slow growth and dormancy (Nemr et al., 2021).

562 Optimizing the processes of isolating microbial strains can rely on the use of plant extract as  
563 medium, thereby providing specific nutrients for the OTUs of interest. For instance, the use of  
564 plant extract added to the medium led to a slight increase in microbial diversity and a sharp  
565 increase of viable bacteria in both minimal and rich media (Eevers et al., 2015). Such an  
566 approach has optimized the cultivability of rhizobacteria and supported recovery from plant-  
567 soil environments (Youssef et al., 2016). Adding to the medium plant extracts of *A. thaliana*  
568 accessions from the natural populations in which the OTU of interest is largely present, may  
569 help to isolate strains from our five remaining strain-free leaf-bacterial associated OTUs. In this  
570 context, it is urgent to develop novel culturing methods mimicking the host habitat. Few  
571 examples have been reported with the isolation chips (Berdy et al., 2017) developed on soil and  
572 sediments, but more efforts are still needed on the plant leaf compartment. Culturomics, the  
573 high-throughput isolation coupled to sequencing and mass-spectrometry, will definitely help in  
574 improving bacterial collections associated with phyllosphere.

575

#### 576 **Extensive genetic and genomic diversities within leaf-associated bacterial OTUs**

577 Extensive genetic and genomic diversity was previously described among strains of the main  
578 pathogenic bacterial species collected in natural populations of *A. thaliana*, including *P.*  
579 *syringae* and *P. viridiflava* (Karasov et al., 2014; Bartoli et al., 2018; Karasov et al., 2018), *X.*  
580 *arboricola* (Wang et al., 2018) and *X. campestris* (Bartoli et al., 2018). In this study, we also  
581 detected an extensive genetic diversity among strains within the leaf-associated bacterial OTUs  
582 considered in this study, at the genome level, for their growth capacities and for their host  
583 responses. This highlights the importance of investigating within-OTU genetic diversity in  
584 order to better understand the functionality of bacteria-bacteria interactions as well as the  
585 interplay between *A. thaliana* and members of its bacterial communities.

586 Genome sequencing confirmed or refined the *gyrB*-based taxonomic affiliation of four OTUs,  
587 *i.e.* *P. fungorum* (OTU2), *Methylobacterium* sp. (OTU13) and the two *Pseudomonas* species *P.*  
588 *moraviensis* (OTU5) and *P. siliginis* (OTU6). All these four bacterial species have been shown  
589 to act as biocontrol agents, to affect root development, to promote vegetative growth and  
590 ultimately yield, of diverse plants such as *A. thaliana*, potato, strawberry, tomato and wheat  
591 (Hultberg et al., 2010; Ul Hassan and Bano, 2015; Rafikova et al., 2016; Klikno and Kutschera,

592 2017; Rahman et al., 2018; Grossi et al., 2020). In addition, both *P. moraviensis* and *P. siliginis*  
593 have been identified as the main candidate bacterial species controlling most members of the  
594 root and leaf bacterial pathobiota, in particular *P. viridiflava* and *X. campestris*, across natural  
595 populations of *A. thaliana* located south-west of France (Bartoli et al., 2018). On the other hand,  
596 despite a deeper taxonomic resolution provided by the *gyrB* gene rather than the *16S rRNA* gene  
597 (Barret et al., 2015; Rezki et al., 2016), the *gyrB*-based taxonomic affiliation of OTU3, OTU4  
598 and OTU29 was only confirmed at the family level by genome sequencing. In addition, genome  
599 sequencing revealed the presence of two bacterial species in OTU3. Altogether, these results  
600 suggest the identification of four novel leaf-associated bacterial species in *A. thaliana*.  
601 Confirming these novel bacterial species would require chemotaxonomic methods, albeit recent  
602 studies argue that a genome sequence suffices to prove that a strain represents a novel species  
603 or not (Vandamme and Sutcliffe, 2021).

604 Similarly to bacterial pathogens, sequencing several strains from the same non-pathogenic  
605 bacterial species revealed a non-negligible fraction of genes that are not common to all strains,  
606 as exemplified for *P. siliginis*. For a given non-pathogenic bacterial species, sequencing the  
607 genome of several tens additional strains will reveal the relative fraction of the core and  
608 accessory genomes. This in turn may help to identify the conserved metabolic pathways  
609 necessary for bacterial growth in any environment and the genes involved in specific  
610 interactions with its abiotic and biotic environment, respectively.

611 In agreement with the genomic variation observed within the OTUs, we detected genetic  
612 variation among strains for host response, which was itself both dependent on the identity of  
613 the *A. thaliana* accession and the plant developmental stage at which strains were inoculated.  
614 This pattern may result from the construction of contrasted ecological niches between  
615 accessions of *A. thaliana* that additionally differ between the seed and seedling stage, thereby  
616 affecting the spectrum of nutrients available for the growth of a specific strain. This hypothesis  
617 is reinforced by the genetic variation of growth kinetics observed among strains either in one  
618 or both of the two media tested. Assessing our 22 candidate bacterial strains for both their  
619 diversity of substrate utilization and their growth kinetics on plant extracts harvested on diverse  
620 *A. thaliana* accessions at complementary developmental stages, may help to better understand  
621 the interplay between within-OTU genetic variation and nutrient availability conditioning on  
622 host genetics and development.

623 Interestingly, for most strains tested in *in vitro* conditions, both positive and negative growth  
624 responses were observed between the eight accessions of *A. thaliana* for a specific strain,

625 whatever the plant developmental stage considered. In our study, declaring a strain as a plant  
626 growth-promoting bacteria (PGPB) would have been highly dependent on the host genetics. On  
627 the other hand, the large genetic variation observed within *A. thaliana* in response to most  
628 bacterial strains provides a unique opportunity to set up Genome-Wide Association studies  
629 based on the 500 whole-genome sequenced accessions located south-west of France (Frachon  
630 et al., 2018), in order to decipher the genetic and molecular mechanisms involved in the  
631 ecologically relevant dialog between *A. thaliana* and the main members of its leaf microbiota.

632 **DATA AVAILABILITY STATEMENT**

633 The whole genome sequences of the 20 bacterial strains have been deposited at  
634 DDBJ/ENA/GenBank. The BioProject accession number is PRJNA848627. The raw  
635 phenotypic data supporting the conclusions of this article will be made available by the authors,  
636 without undue reservation.

637

638

639 **ACKNOWLEDGMENTS**

640 D.R.S. was funded by a PhD fellowship from CONACyT. R.D. was funded by a grant from the  
641 French Ministry of National Education and Research. We are grateful to Carine Huard-  
642 Chauveau and Tatiana Vernié for their help with isolating the 7,259 bacterial colonies, and to  
643 Andy Gloss for advices on plant culture methods. We thank Cécile Pouzet of the TRI-FRAIB  
644 Imaging platform facilities, FR AIB 3450, CNRS-UTIII, for advices for scan measurements.  
645 This study was performed at the LIPME belonging to the Laboratoire d'Excellence (LABEX)  
646 entitled TULIP (ANR-10-LABX-41).

647

648

649 **AUTHOR CONTRIBUTIONS**

650 Conceptualization, F.V., F.R., D.R.-S.; Methodology, D.R.-S., C.G., B.M., E.B., F.V. and F.R.;  
651 Formal Analysis, D.R.-S., C.G., B.M., R.D., V.P., S.C, F.V. and F.R.; Investigation, D.R.-S.,  
652 C.G., B.M., R.D., E.B., F.V. And F.R.; Resources, C.B., F.R., and B.M.; Data Curation: V.P.,  
653 S.C. and C.B.; Writing – Original Draft, D.R.-S., C.G., B.M., S.C., F.V. and F.R.; Writing –  
654 Review & Editing, D.R.-S., C.G., B.M., R.D., C.B., F.V. and F.R. Funding Acquisition, D.R.-  
655 S., F.V. and F.R.; Supervision, F.V. and F.R.

656 **CONTRIBUTION TO THE FIELD STATEMENT**

657 The potential of harnessing the microbiome towards the improvement of plant health is an ever-  
658 growing interest to propose innovative, sustainable and eco-friendly agricultural systems.  
659 While an uncountable number of studies on taxonomic profiling of microbial communities  
660 revealed key patterns of microbiota assemblages in plants, both studying the functionality of  
661 microbiota and establishing causal relationships between plants and non-pathogenic microbes  
662 remains a lofty challenge, which is primarily based on representative collections of microbes  
663 isolated from the diversity of environments inhabited by the plant of interest. Most microbial  
664 collections from *A. thaliana* were built on the isolation of one strain per OTU from a limited  
665 number of sites. Neglecting the ecological potential of genetic diversity within microbial  
666 species may strongly impact the outcomes of plant-microbiota interactions. In this study, we  
667 revealed extensive genetic variation between strains within the most abundant and prevalent  
668 non-pathogenic leaf-associated bacterial species in French natural populations of *A. thaliana*,  
669 at the genomic level, for their growth capacity and their host response. Altogether, our results  
670 highlight the need to consider genetic variation within non-pathogenic bacterial species for a  
671 better understanding of plant-microbiota interactions and the underlying genetic and molecular  
672 mechanisms.

673 **REFERENCES**

674

675 Agler, M. T., Ruhe, J., Kroll, S., Morhenn, C., Kim, S.-T., Weigel, D., et al. (2016). Microbial  
676 Hub Taxa Link Host and Abiotic Factors to Plant Microbiome Variation. *PLoS Biol.* 14,  
677 e1002352.

678 Aleklett, K., Leff, J. W., Fierer, N., and Hart, M. (2015). Wild plant species growing closely  
679 connected in a subalpine meadow host distinct root-associated bacterial communities.  
680 *PeerJ* 3, e804.

681 Bai, Y., Müller, D. B., Srinivas, G., Garrido-Oter, R., Potthoff, E., Rott, M., et al. (2015).  
682 Functional overlap of the Arabidopsis leaf and root microbiota. *Nature* 528, 364–369.

683 Bardou, P., Mariette, J., Escudié, F., Djemiel, C., and Klopp, C. (2014). jvenn: an interactive  
684 Venn diagram viewer. *BMC Bioinformatics* 15, 293.

685 Barret, M., Briand, M., Bonneau, S., Préveaux, A., Valière, S., Bouchez, O., et al. (2015).  
686 Emergence shapes the structure of the seed microbiota. *Appl. Environ. Microbiol.* 81,  
687 1257–1266.

688 Bartoli, C., Boivin, S., Marchetti, M., Gris, C., Gascioli, V., Gaston, M., et al. (2020).  
689 Rhizobium leguminosarum symbiovar viciae strains are natural wheat endophytes and  
690 can stimulate root development and colonization by arbuscular mycorrhizal fungi.  
691 *bioRxiv*. doi: 10.1101/2020.08.07.241844.

692 Bartoli, C., Frachon, L., Barret, M., Rigal, M., Huard-Chauveau, C., Mayjonade, B., et al.  
693 (2018). In situ relationships between microbiota and potential pathobiota in Arabidopsis  
694 thaliana. *ISME J.* 12, 2024–2038.

695 Bartoli, C., Roux, F., and Lamichhane, J. R. (2016). Molecular mechanisms underlying the  
696 emergence of bacterial pathogens: an ecological perspective. *Mol. Plant Pathol.* 17,  
697 303–310.

698 Berdy, B., Spoering, A. L., Ling, L. L., and Epstein, S. S. (2017). In situ cultivation of  
699 previously uncultivable microorganisms using the ichip. *Nat. Protoc.* 12, 2232–2242.

700 Berendsen, R. L., Pieterse, C. M. J., and Bakker, P. A. H. M. (2012). The rhizosphere  
701 microbiome and plant health. *Trends Plant Sci.* 17, 478–486.

702 Bergelson, J., Brachi, B., Roux, F., and Vailleau, F. (2021). Assessing the potential to harness  
703 the microbiome through plant genetics. *Curr. Opin. Biotechnol.* 70, 167–173.

704 Bodenhausen, N., Horton, M. W., and Bergelson, J. (2013). Bacterial communities associated  
705 with the leaves and the roots of Arabidopsis thaliana. *PLoS One* 8, e56329.



- 706 Bulgarelli, D., Rott, M., Schlaeppli, K., Ver Loren van Themaat, E., Ahmadinejad, N., Assenza,  
707 F., et al. (2012). Revealing structure and assembly cues for Arabidopsis root-inhabiting  
708 bacterial microbiota. *Nature* 488, 91–95.
- 709 Bulgarelli, D., Schlaeppli, K., Spaepen, S., Ver Loren van Themaat, E., and Schulze-Lefert, P.  
710 (2013). Structure and functions of the bacterial microbiota of plants. *Annu. Rev. Plant*  
711 *Biol.* 64, 807–838.
- 712 Callahan, B. J., McMurdie, P. J., Rosen, M. J., Han, A. W., Johnson, A. J. A., and Holmes, S.  
713 P. (2016). DADA2: High-resolution sample inference from Illumina amplicon data.  
714 *Nat. Methods* 13, 581–583.
- 715 Carlström, C. I., Field, C. M., Bortfeld-Miller, M., Müller, B., Sunagawa, S., and Vorholt, J. A.  
716 (2019). Synthetic microbiota reveal priority effects and keystone strains in the  
717 Arabidopsis phyllosphere. *Nat. Ecol. Evol.* 3, 1445–1454.
- 718 Castrillo, G., Teixeira, P. J. P. L., Paredes, S. H., Law, T. F., de Lorenzo, L., Feltcher, M. E., et  
719 al. (2017). Root microbiota drive direct integration of phosphate stress and immunity.  
720 *Nature* 543, 513–518.
- 721 Chaumeil, P.-A., Mussig, A. J., Hugenholtz, P., and Parks, D. H. (2019). GTDB-Tk: a toolkit  
722 to classify genomes with the Genome Taxonomy Database. *Bioinformatics*. doi:  
723 10.1093/bioinformatics/btz848.
- 724 Coleman-Derr, D., Desgarenes, D., Fonseca-Garcia, C., Gross, S., Clingenpeel, S., Woyke,  
725 T., et al. (2016). Plant compartment and biogeography affect microbiome composition  
726 in cultivated and native *Agave* species. *New Phytol.* 209, 798–811.
- 727 Cottret, L., Briand, M., Rancurel, C., and Carrere, S. (2018). Family-Companion: analyse,  
728 visualise, browse, query and share your homology clusters. *bioRxiv*. doi:  
729 10.1101/266742.
- 730 Delplace, F., Huard-Chauveau, C., Berthomé, R., and Roby, D. (2021). Network organization  
731 of the plant immune system: from pathogen perception to robust defense induction.  
732 *Plant J.* doi: 10.1111/tpj.15462.
- 733 Deslandes, L., and Rivas, S. (2012). Catch me if you can: bacterial effectors and plant targets.  
734 *Trends Plant Sci.* 17, 644–655.
- 735 Durán, P., Thiergart, T., Garrido-Oter, R., Agler, M., Kemen, E., Schulze-Lefert, P., et al.  
736 (2018). Microbial interkingdom interactions in roots promote Arabidopsis survival. *Cell*  
737 175, 973-983.e14.

- 738 Eevers, N., Gielen, M., Sánchez-López, A., Jaspers, S., White, J. C., Vangronsveld, J., et al.  
739 (2015). Optimization of isolation and cultivation of bacterial endophytes through  
740 addition of plant extract to nutrient media. *Microb. Biotechnol.* 8, 707–715.
- 741 Emms, D. M., and Kelly, S. (2015). OrthoFinder: solving fundamental biases in whole genome  
742 comparisons dramatically improves orthogroup inference accuracy. *Genome Biol.* 16,  
743 157.
- 744 Fitzpatrick, C. R., Salas-González, I., Conway, J. M., Finkel, O. M., Gilbert, S., Russ, D., et al.  
745 (2020). The plant microbiome: From ecology to reductionism and beyond. *Annu. Rev.*  
746 *Microbiol.* 74, 81–100.
- 747 Frachon, L., Bartoli, C., Carrère, S., Bouchez, O., Chaubet, A., Gautier, M., et al. (2018). A  
748 Genomic Map of Climate Adaptation in *Arabidopsis thaliana* at a Micro-Geographic  
749 Scale. *Front. Plant Sci.* 9, 967.
- 750 Frachon, L., Mayjonade, B., Bartoli, C., Hautekèete, N.-C., and Roux, F. (2019). Adaptation to  
751 Plant Communities across the Genome of *Arabidopsis thaliana*. *Mol. Biol. Evol.* 36,  
752 1442–1456.
- 753 Geremia, R. A., Puşcaş, M., Zinger, L., Bonneville, J.-M., and Choler, P. (2016). Contrasting  
754 microbial biogeographical patterns between anthropogenic subalpine grasslands and  
755 natural alpine grasslands. *New Phytol.* 209, 1196–1207.
- 756 Glick, B. R., and Gamalero, E. (2021). Recent developments in the study of plant microbiomes.  
757 *Microorganisms* 9, 1533.
- 758 Götz, S., García-Gómez, J. M., Terol, J., Williams, T. D., Nagaraj, S. H., Nueda, M. J., et al.  
759 (2008). High-throughput functional annotation and data mining with the Blast2GO  
760 suite. *Nucleic Acids Res.* 36, 3420–3435.
- 761 Grossi, C. E. M., Fantino, E., Serral, F., Zawoznik, M. S., Fernandez Do Porto, D. A., and  
762 Ulloa, R. M. (2020). *Methylobacterium* sp. 2A is a plant growth-promoting  
763 rhizobacteria that has the potential to improve potato crop yield under adverse  
764 conditions. *Front. Plant Sci.* 11, 71.
- 765 Hassani, M. A., Durán, P., and Hacquard, S. (2018). Microbial interactions within the plant  
766 holobiont. *Microbiome* 6, 58.
- 767 Hultberg, M., Alsberg, T., Khalil, S., and Alsanius, B. (2010). Suppression of disease in tomato  
768 infected by *Pythium ultimum* with a biosurfactant produced by *Pseudomonas koreensis*.  
769 *Biocontrol (Dordrecht)* 55, 435–444.

- 770 Jain, C., Rodriguez-R, L. M., Phillippy, A. M., Konstantinidis, K. T., and Aluru, S. (2018).  
771 High throughput ANI analysis of 90K prokaryotic genomes reveals clear species  
772 boundaries. *Nat. Commun.* 9, 5114.
- 773 Jones, J. D. G., and Dangl, J. L. (2006). The plant immune system. *Nature* 444, 323–329.
- 774 Jones, P., Binns, D., Chang, H.-Y., Fraser, M., Li, W., McAnulla, C., et al. (2014). InterProScan  
775 5: genome-scale protein function classification. *Bioinformatics* 30, 1236–1240.
- 776 Karasov, T. L., Almario, J., Friedemann, C., Ding, W., Giolai, M., Heavens, D., et al. (2018).  
777 *Arabidopsis thaliana* and *Pseudomonas* Pathogens Exhibit Stable Associations over  
778 Evolutionary Timescales. *Cell Host Microbe* 24, 168-179.e4.
- 779 Karasov, T. L., Kniskern, J. M., Gao, L., DeYoung, B. J., Ding, J., Dubiella, U., et al. (2014).  
780 The long-term maintenance of a resistance polymorphism through diffuse interactions.  
781 *Nature* 512, 436–440.
- 782 Klikno, J., and Kutschera, U. (2017). Regulation of root development in *Arabidopsis thaliana*  
783 by phytohormone-secreting epiphytic methylobacteria. *Protoplasma* 254, 1867–1877.
- 784 Kolmogorov, M., Bickhart, D. M., Behsaz, B., Gurevich, A., Rayko, M., Shin, S. B., et al.  
785 (2020). metaFlye: scalable long-read metagenome assembly using repeat graphs. *Nat.*  
786 *Methods* 17, 1103–1110.
- 787 Koskella, B. (2020). The phyllosphere. *Curr. Biol.* 30, R1143–R1146.
- 788 Lebeis, S. L. (2015). Greater than the sum of their parts: characterizing plant microbiomes at  
789 the community-level. *Curr. Opin. Plant Biol.* 24, 82–86.
- 790 Lebeis, S. L., Paredes, S. H., Lundberg, D. S., Breakfield, N., Gehring, J., McDonald, M., et al.  
791 (2015). PLANT MICROBIOME. Salicylic acid modulates colonization of the root  
792 microbiome by specific bacterial taxa. *Science* 349, 860–864.
- 793 Lindow, S. E., and Brandl, M. T. (2003). Microbiology of the phyllosphere. *Appl. Environ.*  
794 *Microbiol.* 69, 1875–1883.
- 795 Liu, Y.-X., Qin, Y., and Bai, Y. (2019). Reductionist synthetic community approaches in root  
796 microbiome research. *Curr. Opin. Microbiol.* 49, 97–102.
- 797 Lundberg, D. S., Lebeis, S. L., Paredes, S. H., Yourstone, S., Gehring, J., Malfatti, S., et al.  
798 (2012). Defining the core *Arabidopsis thaliana* root microbiome. *Nature* 488, 86–90.
- 799 Magoč, T., and Salzberg, S. L. (2011). FLASH: fast length adjustment of short reads to improve  
800 genome assemblies. *Bioinformatics* 27, 2957–2963.
- 801 Maignien, L., DeForce, E. A., Chafee, M. E., Eren, A. M., and Simmons, S. L. (2014).  
802 Ecological succession and stochastic variation in the assembly of *Arabidopsis thaliana*  
803 phyllosphere communities. *MBio* 5, e00682-13.

- 804 Mayjonade, B., Gouzy, J., Donnadieu, C., Pouilly, N., Marande, W., Callot, C., et al. (2016).  
805 Extraction of high-molecular-weight genomic DNA for long-read sequencing of single  
806 molecules. *Biotechniques* 61, 203–205.
- 807 Meier-Kolthoff, J. P., and Göker, M. (2019). TYGS is an automated high-throughput platform  
808 for state-of-the-art genome-based taxonomy. *Nat. Commun.* 10, 2182.
- 809 Meyer, K. M., Porch, R., Muscettola, I. E., Vasconcelos, A. L. S., Sherman, J. K., Metcalf, C.  
810 J. E., et al. (2022). Plant neighborhood shapes diversity and reduces interspecific  
811 variation of the phyllosphere microbiome. *ISME J.* doi: 10.1038/s41396-021-01184-6.
- 812 Morris, J. J. (2018). What is the hologenome concept of evolution? *F1000Res.* 7, 1664.
- 813 Müller, D. B., Vogel, C., Bai, Y., and Vorholt, J. A. (2016). The Plant Microbiota: Systems-  
814 Level Insights and Perspectives. *Annual Review of Genetics* 50, 211–234. doi:  
815 10.1146/annurev-genet-120215-034952.
- 816 Nemr, R. A., Patz, S., Abdelwakeel, S. M., Khalil, M., Ben Djadid, A., Abdelfadeel, M. R., et  
817 al. (2021). Culture media based on leaf strips/root segments create compatible  
818 host/organ setup for in vitro cultivation of plant Microbiota. *Front. Sustain. Food Syst.*  
819 5. doi: 10.3389/fsufs.2021.660790.
- 820 Ngou, B. P. M., Ding, P., and Jones, J. D. G. (2022). Thirty years of resistance: Zig-zag through  
821 the plant immune system. *Plant Cell* 34, 1447–1478.
- 822 Pieterse, C. M. J., Zamioudis, C., Berendsen, R. L., Weller, D. M., Van Wees, S. C. M., and  
823 Bakker, P. A. H. M. (2014). Induced systemic resistance by beneficial microbes. *Annu.*  
824 *Rev. Phytopathol.* 52, 347–375.
- 825 Platt, A., Horton, M., Huang, Y. S., Li, Y., Anastasio, A. E., Mulyati, N. W., et al. (2010). The  
826 scale of population structure in *Arabidopsis thaliana*. *PLoS Genet.* 6, e1000843.
- 827 Qi, S. S., Bogdanov, A., Cnockaert, M., Acar, T., Ranty-Roby, S., Coenye, T., et al. (2021).  
828 Induction of antibiotic specialized metabolism by co-culturing in a collection of  
829 phyllosphere bacteria. *Environ. Microbiol.* 23, 2132–2151.
- 830 Rafikova, G. F., Korshunova, T. Y., Minnebaev, L. F., Chetverikov, S. P., and Loginov, O. N.  
831 (2016). A new bacterial strain, *Pseudomonas koreensis* IB-4, as a promising agent for  
832 plant pathogen biological control. *Microbiology* 85, 333–341.
- 833 Rahman, M., Sabir, A. A., Mukta, J. A., Khan, M. M. A., Mohi-Ud-Din, M., Miah, M. G., et  
834 al. (2018). Plant probiotic bacteria *Bacillus* and *Paraburkholderia* improve growth, yield  
835 and content of antioxidants in strawberry fruit. *Sci. Rep.* 8. doi: 10.1038/s41598-018-  
836 20235-1.

- 837 Rezki, S., Campion, C., Iacomi-Vasilescu, B., Preveaux, A., Toualbia, Y., Bonneau, S., et al.  
838 (2016). Differences in stability of seed-associated microbial assemblages in response to  
839 invasion by phytopathogenic microorganisms. *PeerJ* 4, e1923.
- 840 Richter, M., Rosselló-Móra, R., Oliver Glöckner, F., and Peplies, J. (2016). JSpeciesWS: a web  
841 server for prokaryotic species circumscription based on pairwise genome comparison.  
842 *Bioinformatics* 32, 929–931.
- 843 Roux, F., and Bergelson, J. (2016). The Genetics Underlying Natural Variation in the Biotic  
844 Interactions of *Arabidopsis thaliana*: The Challenges of Linking Evolutionary Genetics  
845 and Community Ecology. *Curr. Top. Dev. Biol.* 119, 111–156.
- 846 Roux, F., Voisin, D., Badet, T., Balagué, C., Barlet, X., Huard-Chauveau, C., et al. (2014).  
847 Resistance to phytopathogens e tutti quanti: placing plant quantitative disease resistance  
848 on the map. *Mol. Plant Pathol.* 15, 427–432.
- 849 Teixeira, P. J. P. L., Colaianni, N. R., Law, T. F., Conway, J. M., Gilbert, S., Li, H., et al. (2021).  
850 Specific modulation of the root immune system by a community of commensal bacteria.  
851 *Proc. Natl. Acad. Sci. U. S. A.* 118, e2100678118.
- 852 Thiergart, T., Durán, P., Ellis, T., Vannier, N., Garrido-Oter, R., Kemen, E., et al. (2020). Root  
853 microbiota assembly and adaptive differentiation among European *Arabidopsis*  
854 populations. *Nat. Ecol. Evol.* 4, 122–131.
- 855 Trivedi, P., Leach, J. E., Tringe, S. G., Sa, T., and Singh, B. K. (2020). Plant-microbiome  
856 interactions: from community assembly to plant health. *Nat. Rev. Microbiol.* 18, 607–  
857 621.
- 858 Uhse, S., and Djamei, A. (2018). Effectors of plant-colonizing fungi and beyond. *PLoS Pathog.*  
859 14, e1006992.
- 860 Ul Hassan, T., and Bano, A. (2015). The stimulatory effects of L-tryptophan and plant growth  
861 promoting rhizobacteria (PGPR) on soil health and physiology of wheat. *J. soil sci. plant*  
862 *nutr.*, 0–0.
- 863 Vandamme, P., and Sutcliffe, I. (2021). Out with the old and in with the new: time to rethink  
864 twentieth century chemotaxonomic practices in bacterial taxonomy. *Int. J. Syst. Evol.*  
865 *Microbiol.* 71. doi: 10.1099/ijsem.0.005127.
- 866 Vorholt, J. A. (2012). Microbial life in the phyllosphere. *Nat. Rev. Microbiol.* 10, 828–840.
- 867 Vorholt, J. A., Vogel, C., Carlström, C. I., and Müller, D. B. (2017). Establishing causality:  
868 Opportunities of synthetic communities for plant microbiome research. *Cell Host*  
869 *Microbe* 22, 142–155.

- 870 Wagner, M. R., Lundberg, D. S., Del Rio, T. G., Tringe, S. G., Dangl, J. L., and Mitchell-Olds,  
871 T. (2016). Host genotype and age shape the leaf and root microbiomes of a wild  
872 perennial plant. *Nat. Commun.* 7, 12151.
- 873 Wang, M., Roux, F., Bartoli, C., Huard-Chauveau, C., Meyer, C., Lee, H., et al. (2018). Two-  
874 way mixed-effects methods for joint association analysis using both host and pathogen  
875 genomes. *Proc. Natl. Acad. Sci. U. S. A.* 115, E5440–E5449.
- 876 Watanabe, K., Nelson, J., Harayama, S., and Kasai, H. (2001). ICB database: the gyrB database  
877 for identification and classification of bacteria. *Nucleic Acids Res.* 29, 344–345.
- 878 Youssef, H. H., Hamza, M. A., Fayez, M., Mourad, E. F., Saleh, M. Y., Sarhan, M. S., et al.  
879 (2016). Plant-based culture media: Efficiently support culturing rhizobacteria and  
880 correctly mirror their in-situ diversity. *J. Adv. Res.* 7, 305–316.

881 **FIGURE LEGENDS**

882 **Figure 1** | Phylogenetic and morphological diversity of the 12 most prevalent and abundant  
883 OTUs of the leaf compartment among 163 natural populations of *A. thaliana* located south-  
884 west of France. **(A)** *gyrB* amplicon based phylogenetic tree of the 30 most abundant OTUs of  
885 the leaf compartment among 163 natural populations of *A. thaliana*. The 12 most prevalent and  
886 abundant OTUs are underlined in blue. The OTU8 corresponding to *Pseudomonas viridiflava*  
887 for which 74 isolated strains were confirmed to be pathogenic, is underlined in red. **(B)**  
888 Morphological diversity of the seven OTUs for which representative strains have been isolated.

889

890 **Figure 2** | Venn diagram illustrating the number of common and specific orthogroups among  
891 the six strains of OTU6\_ *Pseudomonas siliginis*. Colored bars indicate the number of  
892 orthogroups for each strain. The vertical stacked bar plot indicates the number of orthogroups  
893 specific to one strain (right) or shared between two to six strains.

894

895 **Figure 3** | Inter- and intra-OTU genetic variation for growth kinetics on two media with  
896 contrasting nutrient availability. **(A)** Variation among the OTUs for growth kinetics on the R2A  
897 minimal medium. **(B)** Variation among the OTUs for growth kinetics on the TSB rich medium.  
898 **(C), (E), (G)** and **(I)** Intra-OTU genetic variation for the OTUs 6, 3a, 3b and 29 on the R2A  
899 minimal medium. **(D), (F), (H)** and **(J)** Intra-OTU genetic variation for the OTUs 6, 3a, 3b and  
900 29 on the TSB rich medium.

901

902 **Figure 4** | Genetic variation among eight *A. thaliana* accessions in response to 22 bacterial  
903 strains inoculated at the seed stage in *in vitro* conditions. **(A)** Photography illustrating plants  
904 grown in 48-well plates and scored *in vitro* at 28 dai. **(B)** Scoring scale of plant development  
905 after inoculation at the seed stage, ranging from 1 (very small and/or not healthy plant) to 7  
906 (very well-grown and/or healthy plant). **(C)** Double hierarchical clustering based on genotypic  
907 values, illustrating the genetic variation among the eight *A. thaliana* accessions in response to  
908 the 22 representative bacterial strains belonging to eight OTUs 28 dai. Inner plot: Histogram  
909 illustrating the distribution of genotypic values for plant development according a scale from 1  
910 to 7.

911

912 **Figure 5** | Genetic variation among eight *A. thaliana* accessions in response to 22 bacterial  
913 strains inoculated at the seedling stage in *in vitro* conditions. **(A)** Photography illustrating plants  
914 grown in 24-well plates and scored *in vitro* at 21 dai. **(B)** Scoring scale of plant development  
915 after inoculation at the seed stage, ranging from 1 (very small and/or not healthy plant) to 8  
916 (very well-grown and/or healthy plant). **(C)** Double hierarchical clustering based on genotypic  
917 values illustrating the genetic variation among the eight *A. thaliana* accessions in response to  
918 the 22 representative bacterial strains belonging to eight OTUs 21 dai. Inner plot: Histogram  
919 illustrating the distribution of genotypic values for plant development according a scale from 4  
920 to 7.5.

921

922

923 **Supplementary Material including four Supplementary Figures and four Supplementary**  
924 **Tables.**

925 **Supplementary Figure 1** | CBC and informative-driven approaches to isolate representative  
926 strains of the 12 most abundant and prevalent leaf OTUs across 163 natural populations of  
927 *Arabidopsis thaliana* located south-west of France.

928

929 **Supplementary Figure 2** | Pictures illustrating the habitats of the seven accessions chosen to  
930 test host genetic variation in response to bacterial isolates.

931

932 **Supplementary Figure 3** | Intra-OTU genetic variation for growth kinetics on two media with  
933 contrasting nutrient availability. **(A)**, **(C)**, **(E)** and **(G)** Intra-OTU genetic variation for the OTUs  
934 4, 5, 13 and 2 on the R2A minimal medium. **(B)**, **(D)**, **(F)** and **(H)** Within-OTU genetic variation  
935 for the OTUs 4, 5, 13 and 2 on the TSB rich medium.

936

937 **Supplementary Figure 4** | Double hierarchical clustering based on genotypic values,  
938 illustrating the genetic variation among the eight *A. thaliana* accessions in response to the 22  
939 representative bacterial strains belonging to eight OTUs at 28 dai. **(A)** Inoculation at the seed  
940 stage with scoring at 14 dai (top panel) and 21 dai (bottom panel). **(B)** Inoculation at the seedling



941 stage with scoring at 7 dai (top panel) and 14 dai (bottom panel). Inner plots: Histograms  
942 illustrating the distribution of genotypic values for plant development.

943

944 **Supplementary Table 1** | Details about the isolation of the strains characterized in this study.  
945 CBC: Community-Based Culture.

946

947 **Supplementary Table 2** | Primers used to validate the genus level of the OTUs for the  
948 informative-driven approach.

949

950 **Supplementary Table 3** | *gyrB* primers designed in this study for the informative driven  
951 approach.

952

953 **Supplementary Table 4** | ANI values among strains within each OTU. Values highlighted in  
954 orange indicate that the strain OTU3b\_Oxa\_1 belongs to a different bacterial species to which  
955 belong the strains OTU3a\_Oxa\_1 and OTU3a\_Oxa\_2. Values highlighted in light blue indicate  
956 the three strains from OTU5 and the six strains from OTU6 belong to two distinct bacterial  
957 species. NE: not estimated

958

959 **Supplementary Table 5** | Genetic variation among eight *A. thaliana* accessions in response to  
960 22 bacterial strains inoculated at the seed stage in *in vitro* conditions. The statistical term  
961 'Treatment' corresponds to the effect of each bacterial strain in comparison with the mock  
962 treatment. Bold values indicate significant *p* values after a False Discover Rate (FDR)  
963 correction at a nominal level of 5%.

964

965 **Supplementary Table 6** | Genetic variation among eight *A. thaliana* accessions in response to  
966 22 bacterial strains inoculated at the seedling stage in *in vitro* conditions. The statistical term  
967 'Treatment' corresponds to the effect of each bacterial strain in comparison with the mock  
968 treatment. Bold values indicate significant *p* values after a False Discover Rate (FDR)  
969 correction at a nominal level of 5%.

970 **Supplementary Data Set 1.** Taxonomic affiliation after blasting a *gyrB* amplicon of the 12  
971 most prevalent and abundant OTUs against the NCBI database.

972 **Supplementary Data Set 2.** Forward and reverse *gyrB* primers containing different internal  
973 tags in order to multiplex the 7259 amplicons from 76 96-well plates, corresponding to 7259  
974 picked colonies, on a single Miseq run.

975 **Supplementary Data Set 3.** Barcodes for Illumina libraries with associated SRA numbers.

976 **Supplementary Data Set 4.** Demultiplexing statistics for each of the 7,259 sequenced colonies.

977 **Supplementary Data Set 5.** *gyrB* database (v2) used for taxonomic affiliation with DADA2.

978 **Supplementary Data Set 6.** Taxonomic affiliation of the seven OTUs for which representative  
979 strains have been isolated, by using FastANI on the whole-genome sequence of the 20 strains.

**Table 1.** List of the 12 most prevalent and abundant OTUs of the leaf compartment among 163 natural populations of *A. thaliana* located south-west of France. Lines highlighted in light grey correspond to OTUs for which representative strains have been isolated.

| OTU<br>Bartoli <i>et al.</i> (2018) | <i>gyrB</i> based taxonomic affiliation | Prevalence (%) | Mean relative abundance (%) | ANI based taxonomic affiliation    | Strain name                                                                      |
|-------------------------------------|-----------------------------------------|----------------|-----------------------------|------------------------------------|----------------------------------------------------------------------------------|
| OTU_1                               | <i>Sphingomonas</i> sp.                 | 44.6           | 16.07                       |                                    |                                                                                  |
| OTU_2                               | <i>Paraburkholderia fungorum</i>        | 5.7            | 1.79                        | <i>Paraburkholderia fungorum</i>   | OTU2_Pfu_1<br>OTU2_Pfu_2<br>OTU2_Pfu_3                                           |
| OTU_3                               | <i>Collimonas</i> sp.                   | 43.1           | 5.65                        | <i>Oxalobacteraceae</i> bacterium  | OTU3a_Oxa_1<br>OTU3a_Oxa_2<br>OTU3b_Oxa_1<br>OTU3b_Oxa_2                         |
| OTU_4                               | <i>Variovorax</i> sp.                   | 41.8           | 5.33                        | <i>Comamonadaceae</i> bacterium    | OTU4_Com_1                                                                       |
| OTU_5                               | <i>Pseudomonas moraviensis</i>          | 12.3           | 1.18                        | <i>Pseudomonas moraviensis</i>     | OTU5_Pmo_1<br>OTU5_Pmo_2<br>OTU5_Pmo_3                                           |
| OTU_6                               | <i>Pseudomonas koreensis</i>            | 12.2           | 1.11                        | <i>Pseudomonas siliginis</i>       | OTU6_Psi_1<br>OTU6_Psi_2<br>OTU6_Psi_3<br>OTU6_Psi_4<br>OTU6_Psi_5<br>OTU6_Psi_6 |
| OTU_10                              | <i>Acidovorax</i> sp.                   | 11.9           | 1.36                        |                                    | -                                                                                |
| OTU_12                              | <i>Variovorax</i> sp.                   | 9.4            | 0.7                         |                                    | -                                                                                |
| OTU_13                              | <i>Methylobacterium extorquens</i>      | 14.1           | 0.98                        | <i>Methylobacterium</i> sp.        | OTU13_Msp_1<br>OTU13_Msp_2                                                       |
| OTU_14                              | <i>Caulobacter</i> sp.                  | 9.9            | 0.89                        |                                    | -                                                                                |
| OTU_15                              | <i>Modestobacter</i> sp.                | 9.7            | 0.85                        |                                    | -                                                                                |
| OTU_29                              | <i>Sphingomonas melonis</i>             | 14             | 0.89                        | <i>Sphingomonadaceae</i> bacterium | OTU29_Sph_1<br>OTU29_Sph_2<br>OTU29_Sph_3                                        |

**Table 2.** Summary of the assembly and annotation characteristics of the 20 whole-genome sequenced strains belonging to eight OTUs.

| Strains     | Total assembly size (bp) | Number of contigs | Number of chromosomes | Chromosome size (Mb) | Number of plasmids | Plasmids size (Kb)    | G+C content (%) | Number of genes | Number of CDSs (coding) | rRNA | tRNA | Number of CDSs with assigned function | Number of CDSs without assigned function |
|-------------|--------------------------|-------------------|-----------------------|----------------------|--------------------|-----------------------|-----------------|-----------------|-------------------------|------|------|---------------------------------------|------------------------------------------|
| OTU2_Pfu_1  | 9,357,004                | 6                 | 2                     | 4.78 + 3.53          | 4                  | 435 + 295 + 228 + 84  | 62%             | 8624            | 8465                    | 12   | 74   | 5384 (63.6%)                          | 3081 (36.4%)                             |
| OTU2_Pfu_2  | 9,120,800                | 4                 | 2                     | 4.94 + 3.58          | 2                  | 447 + 147             | 62%             | 8329            | 8171                    | 12   | 71   | 5313 (65.0%)                          | 2858 (35.0%)                             |
| OTU2_Pfu_3  | 9,122,278                | 4                 | 2                     | 4.94 + 3.59          | 2                  | 447 + 147             | 62%             | 8327            | 8169                    | 12   | 71   | 5313 (65.04%)                         | 2856 (34.96%)                            |
| OTU3a_Oxa_1 | 7,481,272                | 1                 | 1                     | 7.48                 | 0                  |                       | 64%             | 6337            | 6208                    | 14   | 86   | 3969 (63.9%)                          | 2239 (36.0%)                             |
| OTU3a_Oxa_2 | 7,693,415                | 1                 | 1                     | 7.69                 | 0                  |                       | 64%             | 6514            | 6382                    | 14   | 89   | 4055 (63.5%)                          | 2327 (36.46%)                            |
| OTU3b_Oxa_1 | 6,868,374                | 1                 | 1                     | 6.87                 | 0                  |                       | 64%             | 5935            | 5795                    | 14   | 97   | 3657 (63.1%)                          | 2138 (36.9%)                             |
| OTU4_Com_1  | 4,655,332                | 5                 | 1                     | 3.29                 | 4                  | 493 + 424 + 290 + 159 | 70%             | 4268            | 4183                    | 6    | 53   | 2842 (67.9%)                          | 1341 (32.1%)                             |
| OTU5_Pmo_1  | 6,004,654                | 1                 | 1                     | 6.00                 | 0                  |                       | 60%             | 5446            | 5272                    | 16   | 72   | 3526 (66.9%)                          | 1746 (33.1%)                             |
| OTU5_Pmo_2  | 5,969,148                | 1                 | 1                     | 5.97                 | 0                  |                       | 60%             | 5412            | 5238                    | 16   | 71   | 3502 (66.9%)                          | 1736 (33.1%)                             |
| OTU5_Pmo_3  | 5,980,820                | 1                 | 1                     | 5.98                 | 0                  |                       | 60%             | 5416            | 5242                    | 16   | 70   | 3528 (67.3%)                          | 1714 (32.7%)                             |
| OTU6_Psi_1  | 5,988,833                | 1                 | 1                     | 5.99                 | 0                  |                       | 60%             | 5458            | 5282                    | 16   | 73   | 3539 (67.0%)                          | 1743 (33.0%)                             |
| OTU6_Psi_2  | 6,005,098                | 1                 | 1                     | 6.00                 | 0                  |                       | 60%             | 5401            | 5227                    | 16   | 72   | 3520 (67.5%)                          | 1697 (32.5%)                             |
| OTU6_Psi_3  | 5,986,784                | 1                 | 1                     | 5.99                 | 0                  |                       | 60%             | 5431            | 5258                    | 16   | 71   | 3522 (67.0%)                          | 1736 (33.0%)                             |
| OTU6_Psi_4  | 5,915,411                | 1                 | 1                     | 5.91                 | 0                  |                       | 60%             | 5377            | 5205                    | 16   | 73   | 3513 (67.5%)                          | 1692 (32.5%)                             |
| OTU6_Psi_5  | 6,095,266                | 2                 | 1                     | 5.99                 | 1                  | 103                   | 60%             | 5597            | 5422                    | 16   | 74   | 3562 (65.7%)                          | 1860 (34.3%)                             |
| OTU6_Psi_6  | 5,918,345                | 1                 | 1                     | 5.92                 | 0                  |                       | 60%             | 5423            | 5247                    | 16   | 75   | 3510 (66.9%)                          | 1737 (33.1%)                             |
| OTU13_Msp_1 | 5,074,646                | 5                 | 1                     | 4.90                 | 4                  | 56 + 42 + 40 + 38     | 69%             | 4903            | 4800                    | 15   | 64   | 2608 (54.3%)                          | 2192 (45.7%)                             |
| OTU29_Sph_1 | 3,810,917                | 3                 | 1                     | 3.62                 | 2                  | 126 + 65              | 66%             | 3629            | 3551                    | 9    | 55   | 2103 (59.2%)                          | 1448 (40.8%)                             |
| OTU29_Sph_2 | 3,825,112                | 2                 | 1                     | 3.76                 | 1                  | 65                    | 66%             | 3610            | 3532                    | 9    | 56   | 2128 (60.2%)                          | 1404 (39.8%)                             |
| OTU29_Sph_3 | 4,127,732                | 2                 | 1                     | 4.00                 | 1                  | 74                    | 66%             | 3931            | 3851                    | 9    | 58   | 2258 (58.6%)                          | 1593 (41.4%)                             |

**Figure 1.**

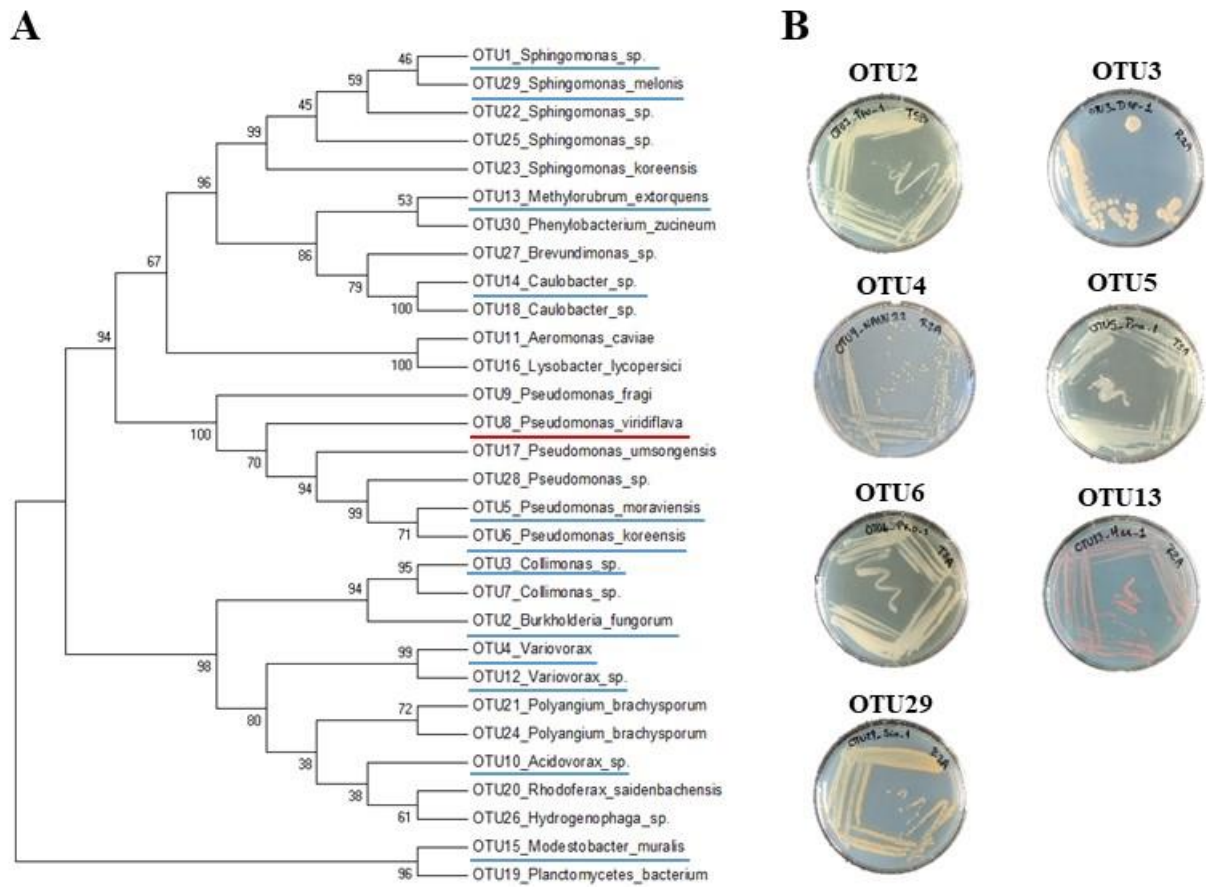



Figure 3

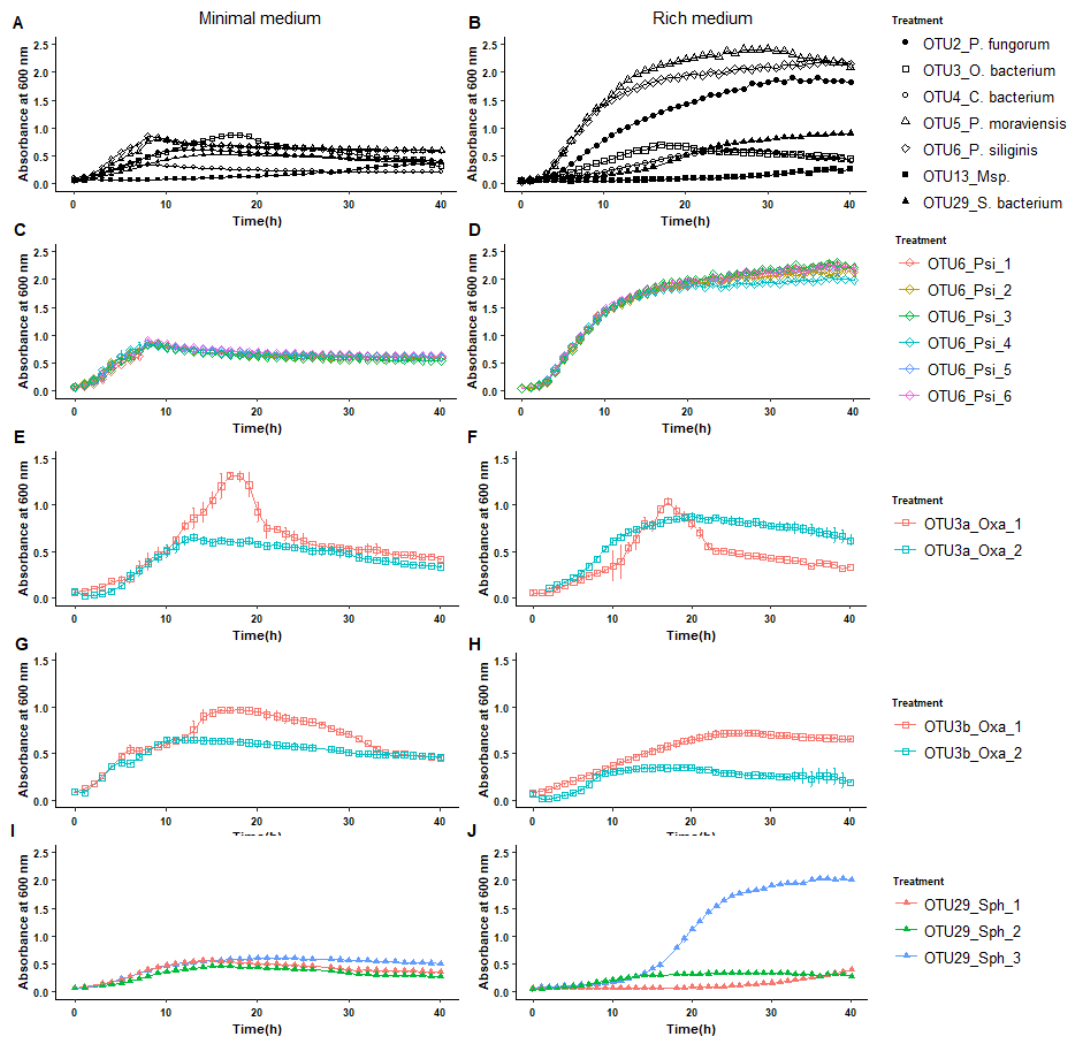

**Figure 4**

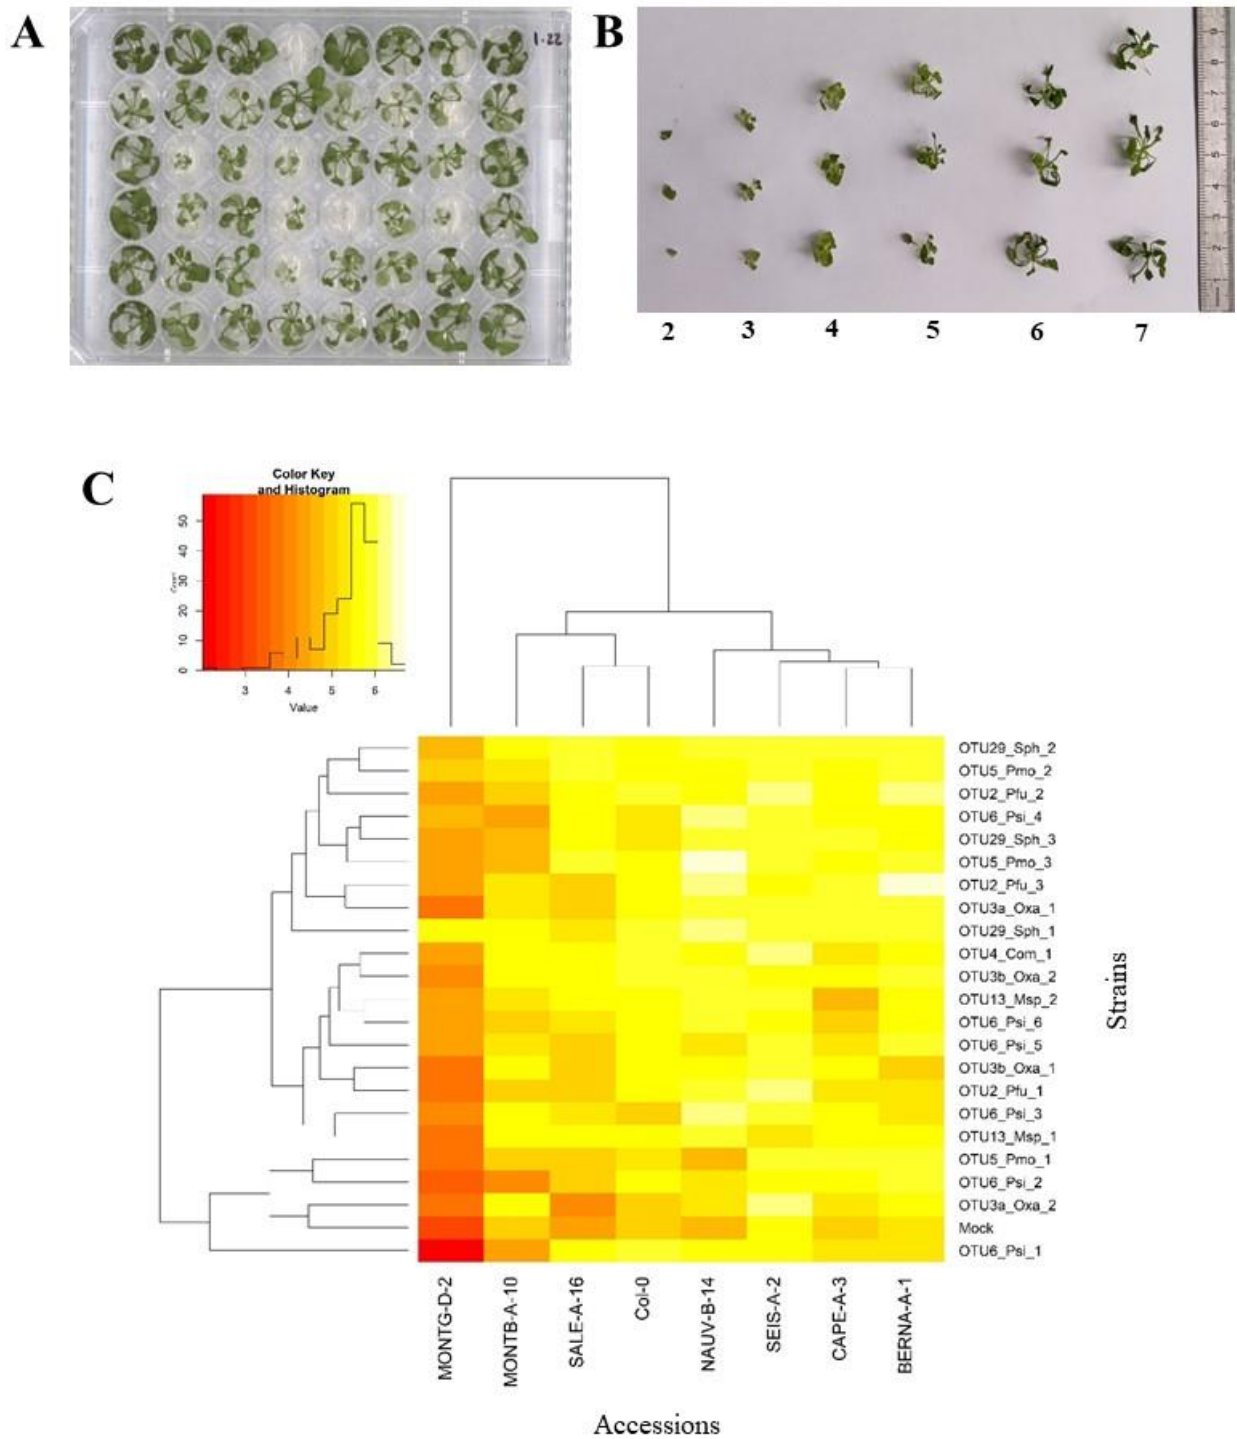



Figure 5

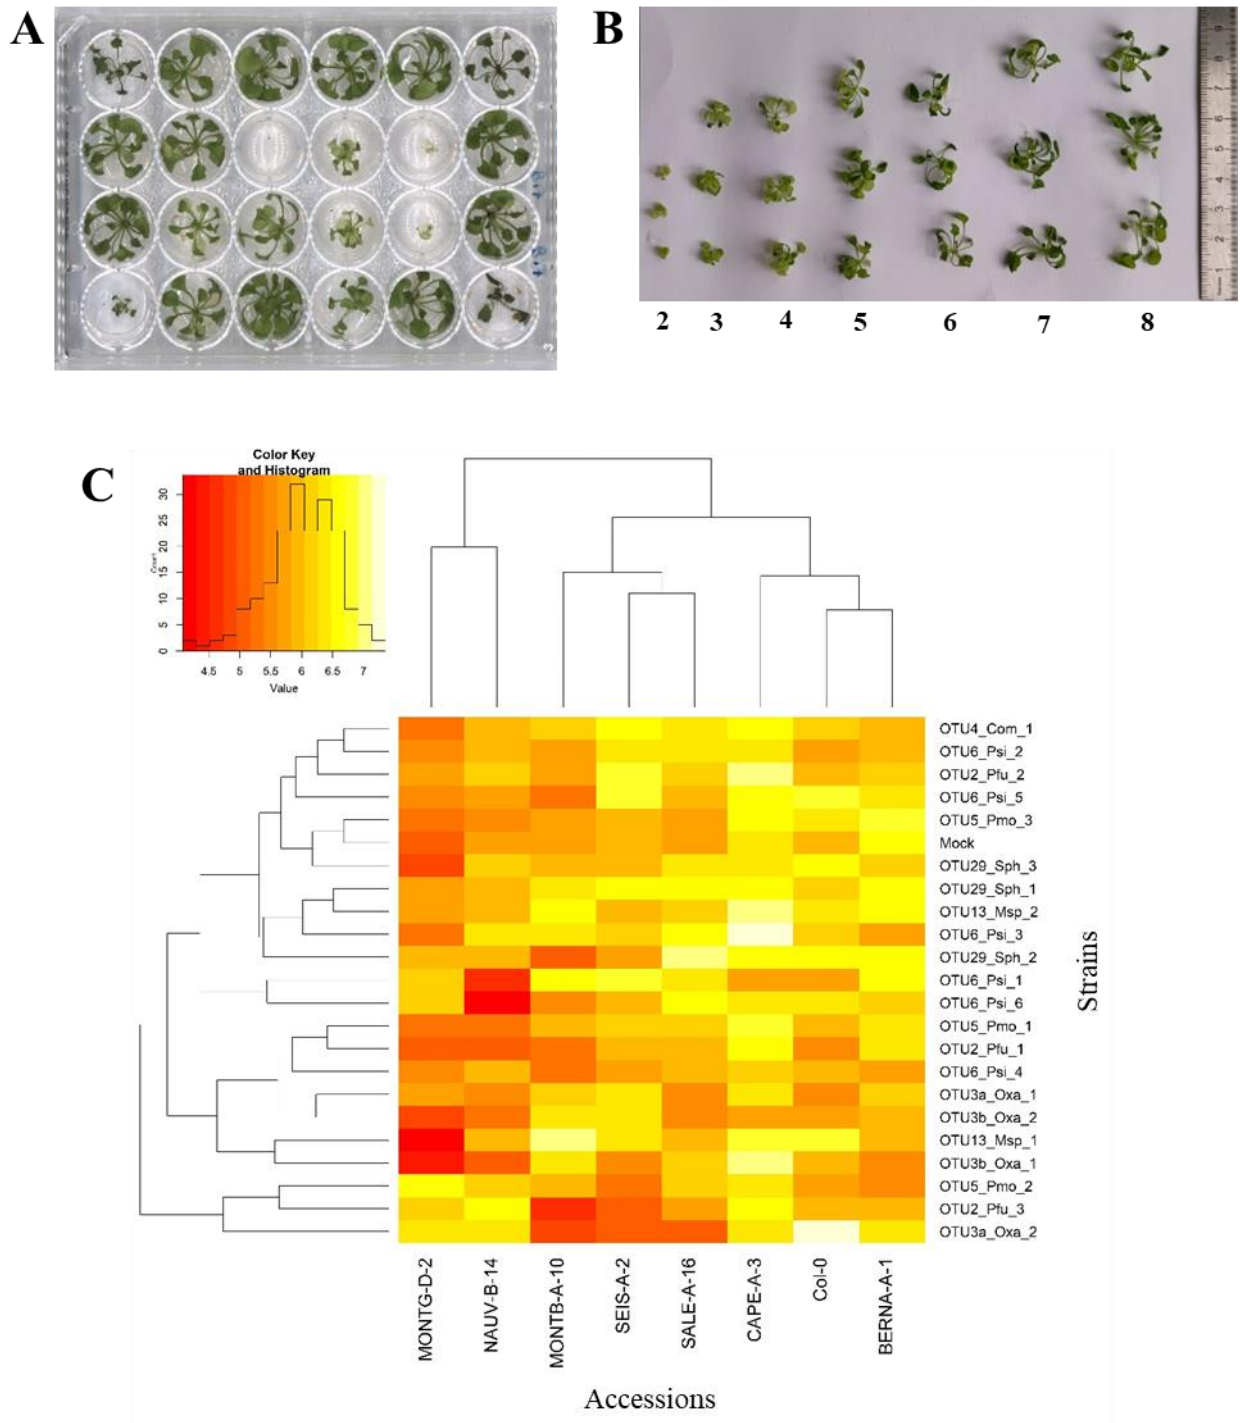

Source: http://biorxiv.org/content/10.1101/2022.07.05.498547v1.full.pdf
